# Supplementary material for: m6A mRNA modifications are deposited in nascent pre-mRNA and are not required for splicing but do specify cytoplasmic turnover
Source: PubMed Central journal article supplement (PMC5495127; doi:10.1101/gad.301036.117), 2017-05-15
Supplement: supp_31.10.990_SupplementalMaterialandMethods.pdf [file supp_31.10.990_SupplementalMaterialandMethods.pdf]

**Supplemental Material For Ke et al. *Genes & Development* 2017**

**m<sup>6</sup>A mRNA modifications are deposited in nascent pre-mRNA and are not required  
for splicing but do specify cytoplasmic turnover**

Shengdong Ke<sup>1</sup>, Amy Pandya-Jones<sup>2</sup>, Yuhki Saito<sup>1</sup>, John J. Fak<sup>1</sup>, Cathrine Broberg Vågbo<sup>3</sup>, Shay Geula<sup>4</sup>, Jacob H. Hanna<sup>4</sup>, Douglas L. Black<sup>2</sup>, James E. Darnell, Jr.<sup>5,6</sup>, Robert B. Darnell<sup>1,6</sup>

<sup>6</sup>Correspondences:

Email: [darnelr@rockefeller.edu](mailto:darnelr@rockefeller.edu)

Email: [darnell@rockefeller.edu](mailto:darnell@rockefeller.edu)

- A. Legend to Supplemental Figures (Figure S1 to S12) and Supplemental Tables (Table S1 to S5)
- B. Supplemental Figure S1 to S12
- C. Supplemental Table S1 to S5
- D. Supplemental Methods and Materials
- E. A protocol for m<sup>6</sup>A-CLIP (Ke et al. *Genes & Development* 2015) with a detailed arrangement of experiments into different days

## Legend to Supplemental Figures and Tables

**Supplemental Fig 1.** Many exons are not yet spliced in CA-RNAs according to intron splicing completion index (see also Fig1A which uses internal exon splicing completion index).

**Supplemental Fig 2.** . Both exonic and intronic m<sup>6</sup>A peaks in all three RNA fractions identified RRACU consensus motif. Intronic m<sup>6</sup>A peaks in CA-RNA contain both its unique intronic m<sup>6</sup>A peaks and those conserved in other fractions. These nucleoplasmic and cytoplasmic “intronic m<sup>6</sup>As” would not be likely in real introns. They are probably exonic m<sup>6</sup>As, same as the rest 98% of m<sup>6</sup>As (current reference annotations are yet to be complete, and the existence of these “intronic m<sup>6</sup>As” in Cytoplasmic polyA+ RNAs rules out the ce-RNA possibility). Data analysis in Figure 4C and Supplemental Figure 5 has comprehensively summarized all m<sup>6</sup>As statistically (including both exonic m<sup>6</sup>As and these so called “intronic m<sup>6</sup>As”). The actual number of 4% CA-RNA only intron m<sup>6</sup>A is 937 (the number for the 3% “intron m<sup>6</sup>As” conserved in other fractions is 657). The great preference of m<sup>6</sup>A to exons is evident but imperfect as there are still few intronic m<sup>6</sup>As in CA-RNA.

**Supplemental Fig 3.** m<sup>6</sup>A peaks have the same distribution in RNAs from the three cell fractions (anchoring at stop codon). Black line represents mRNAs with stop codon in last exon; red line represents mRNAs with stop codon not in last exon. The shade region (grey and light pink) is the standard error of the mean (S.E.M.). (Not only distribution is the same but also the m<sup>6</sup>A peak strength for individual m<sup>6</sup>A peaks, see Fig. 2)

**Supplemental Fig 4.** Exon m<sup>6</sup>A addition to nascent pre-mRNA is independent of its

**distance to polyA sites.**

A) Internal exons close to polyA sites in CA-RNA are less completely spliced (See details in Supplemental Materials and Methods). \*\*\*,  $p < 10^{-15}$ , Wilcox ranked test.

B) A similar frequency (~4%) of m<sup>6</sup>A occurs to internal exons of CA-RNA regardless of the distance to the polyA site (n.s. stands for not significant).

**Supplemental Fig 5.** m<sup>6</sup>A can be added to exons before splicing. These are additional examples to the two shown in Fig 3A and B. “m<sup>6</sup>A-CLIP site” shows a precise m<sup>6</sup>A site (black box) identified by m<sup>6</sup>A-CLIP. “IP reads” lists the cDNA reads of RNA fragments that were precipitated by m<sup>6</sup>A specific antibody and contain both the m<sup>6</sup>A site and the unspliced intronic region.

**Supplemental Fig 6.** CA-RNA higher m<sup>6</sup>As are relatively more favored in internal exons, most of which are constitutive exons.

**Supplemental Fig 7.** The majority of m<sup>6</sup>As do not locate close to splice site (alternative exons). Density of m<sup>6</sup>A at increasing distance from 3' or 5' splice sites in CA-RNA (orange lines), nucleoplasm (dark blue) and cytoplasm (light blue). “relative m<sup>6</sup>A peak density” for a fixed position to splice site is calculated as the scaled m<sup>6</sup>A peak density at that position scaled proportional to the average m<sup>6</sup>A peak density in exonic regions >100nt away from splice sites (black line). To clearly show the distribution of m<sup>6</sup>A peaks to splice sites, we focus on internal exons with exon length at least 200nt so that the 100nt exon regions from 5'SS and 3'SS do not overlap. As the major form of alternative splicing, alternative cassette exons are studied here. Error bar is the S.E.M.. A)

Alternative cassette exons in HeLa cell (the center exon is required to have m<sup>6</sup>A, total exon number: 1072); B) Alternative cassette exons in mouse ES cell (the center exon is

required to have m<sup>6</sup>A, total exon number: 313). C) Alternative cassette exons using Yang group's raw data could still not reproduce the sharp enrichment of m<sup>6</sup>A at splice sites.

(See also Supplemental Figure 8)

**Supplemental Fig 8.** The majority of m<sup>6</sup>As do not locate close to splice site, reanalysis of the raw sequencing data from different labs. A) Our own m<sup>6</sup>A mapping data, and the top enriched motif in m<sup>6</sup>A peaks is RRACU; B) Reanalysis of the raw sequencing data of Zhao et al 2014 (Yang Lab), and the top enriched motif in m<sup>6</sup>A peaks is not RRACU; C) Reanalysis of the raw sequencing data of Schwart et al 2014 (Regev lab), and the top enriched motif in m<sup>6</sup>A peaks is RRACU. D) Reanalysis of the raw sequencing data of Meyer et al 2012 (Jaffrey lab), and the top enriched motif in m<sup>6</sup>A peaks is RRACU.

**Supplemental Fig 9.** Internal exons containing m<sup>6</sup>As splices mostly the same upon different level of global m<sup>6</sup>A loss by compromising Mettl3 expression level, using raw RNAseq data of several published papers that reported certain splicing changes upon compromising Mettl3 expression level. Internal constitutive exons with m<sup>6</sup>A are defined as the tri-exon structure with constitutive exon being the center exon, and we require at least one of the three exons should have m<sup>6</sup>A. (Significant changes were defined as delta PSI  $\geq 0.1$  and FDR  $< 5\%$ ). Internal alternative cassette exons with m<sup>6</sup>A are defined as the tri-exon structure with alternative cassette exon being the center exon, and we require at least one of the three exons should have m<sup>6</sup>A. (Significant changes were defined as delta PSI  $\geq 0.1$  and FDR  $< 5\%$ ). Other alternative splicing types showed even less changes including alternative 5' splice site, alternative 3' splice site and intron retention. A) using the raw RNAseq data from Dominissini et al Nature 2012 (Dominissini et al., 2012); B) using raw RNAseq data from Zhao et al Cell Research 2014 (Zhao et al., 2014); C) using

raw RNAseq data from Geula et al Science 2015 (Geula et al., 2015); D) using raw RNAseq data from Liu et al Nature 2015 (Liu et al., 2015).

**Supplemental Fig 10.** mRNAs with shorter half-life have higher m<sup>6</sup>A density. A) HeLa cell (anchoring at last exon start, using T<sub>1/2</sub> of Tani *et al* 2012 (Tani et al., 2012), see also Fig. 5A for anchoring at stop codon); B) HeLa cell (using T<sub>1/2</sub> from the other group, Yang *et al* 2002 (Yang et al., 2003)); C) Mouse ES cell (anchoring at last exon start, see also Fig. 5B for anchoring at stop codon)

**Supplemental Fig 11.** Identifying Mettl3-dependent m<sup>6</sup>A peaks (i.e. WT higher) by comparison of WT mRNA to Mettl3 KO RNA for m<sup>6</sup>A signal strength (no changes, grey; WT higher, red; KO higher, dark blue; Significant changes require fold of change ≥ 2 and FDR < 5%, Fisher's exact test)

**Supplemental Fig 12.** Co-IP between m<sup>6</sup>A methyltransferase (METTL3 and METTL14), U1 snRNP and U2AF proteins involved in exon definition (U1A and U2AF65). As control, RBFOX2 can co-IP hnRNP M but not Pol II (Damianov et al., 2016). Endogenous protein co-IP was performed on a high molecular weight (HMW) nuclear fraction that was released from chromatin and preserved some protein-protein interaction intact (Damianov et al., 2016). Detailed antibody information is provided in Supplemental Material and Methods.

**Supplemental Table 1.** List of m<sup>6</sup>A sites that are nearby splice sites and yield m<sup>6</sup>A-containing exon-intron junction fragments in nascent RNA

**Supplemental Table 2.** List of several SR proteins binding site information (could be bound by SR proteins and act as ESEs, motifs are highly degenerate)

**Supplemental Table 3.** List of Gene Ontologies (GOs) that are significantly enriched in short  $T_{1/2}$  mRNAs with multiple m<sup>6</sup>As ( $\geq 2$ ), and most GOs are associated with regulatory functions.

**Supplemental Table 4.** List of Gene Ontologies (GOs) that are significantly enriched in long  $T_{1/2}$  mRNAs with no m<sup>6</sup>A, and most GOs are associated with house keeping functions.

**Supplemental Table 5.** List of Gene Ontologies (GOs) that are significantly enriched in short  $T_{1/2}$  mRNAs with no m<sup>6</sup>A, and most GOs are associated with nucleosome related functions.

#### Reference:

- Damianov A, Ying Y, Lin CH, Lee JA, Tran D, Vashisht AA, Bahrami-Samani E, Xing Y, Martin KC, Wohlschlegel JA, Black DL. 2016. Rbfox Proteins Regulate Splicing as Part of a Large Multiprotein Complex LASR. *Cell* **165**: 606–619.
- Dominissini D, Moshitch-Moshkovitz S, Schwartz S, Salmon-Divon M, Ungar L, Osenberg S, Cesarkas K, Jacob-Hirsch J, Amariglio N, Kupiec M, Sorek R, Rechavi G. 2012. Topology of the human and mouse m<sup>6</sup>A RNA methylomes revealed by m<sup>6</sup>A-seq. *Nature* **485**: 201–206.
- Geula S, Moshitch-Moshkovitz S, Dominissini D, Mansour AA, Kol N, Salmon-Divon M, Hershkovitz V, Peer E, Mor N, Manor YS, Ben-Haim MS, Eyal E, Yunger S, Pinto Y, Jaitin DA, Viukov S, Rais Y, Krupalnik V, Chomsky E, Zerbib M, Maza I, Rechavi Y, Massarwa R, Hanna S, Amit I, Levanon EY, Amariglio N, Stern-Ginossar N, Novershtern N, Rechavi G, Hanna JH. 2015. Stem cells. m<sup>6</sup>A mRNA methylation facilitates resolution of naive pluripotency toward differentiation. *Science* **347**: 1002–1006.
- Liu N, Dai Q, Zheng G, He C, Parisien M, Pan T. 2015. N(6)-methyladenosine-dependent RNA structural switches regulate RNA-protein interactions. *Nature* **518**: 560–564.

Tani H, Mizutani R, Salam KA, Tano K, Ijiri K, Wakamatsu A, Isogai T, Suzuki Y, Akimitsu N. 2012. Genome-wide determination of RNA stability reveals hundreds of short-lived noncoding transcripts in mammals. *Genome Res* **22**: 947–956.

Yang E, van Nimwegen E, Zavolan M, Rajewsky N, Schroeder M, Magnasco M, Darnell JEJ. 2003. Decay rates of human mRNAs: correlation with functional characteristics and sequence attributes. *Genome Res* **13**: 1863–1872.

Zhao X, Yang Y, Sun BF, Shi Y, Yang X, Xiao W, Hao YJ, Ping XL, Chen YS, Wang WJ, Jin KX, Wang X, Huang CM, Fu Y, Ge XM, Song SH, Jeong HS, Yanagisawa H, Niu Y, Jia GF, Wu W, Tong WM, Okamoto A, He C, Rendtlew Danielsen JM, Wang XJ, Yang YG. 2014. FTO-dependent demethylation of N6-methyladenosine regulates mRNA splicing and is required for adipogenesis. *Cell Res* **24**: 1403–1419.

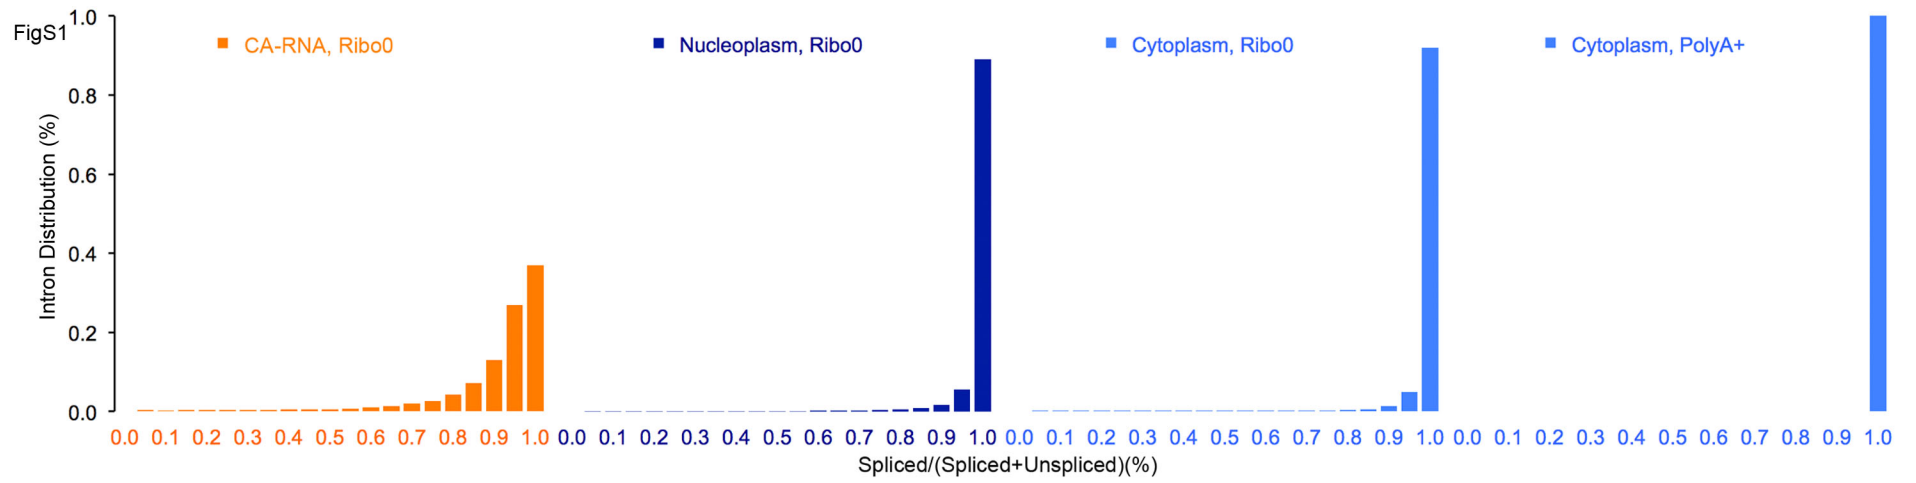



# FigS2

|                                    | Motif | P-value |
|------------------------------------|-------|---------|
| CA-RNA<br>exonic m6A               |       | 1e-480  |
| CA-RNA<br>intronic m6A             |       | 1e-47   |
| Nucleoplasm, Ribo0<br>exonic m6A   |       | 1e-706  |
| Nucleoplasm, Ribo0<br>intronic m6A |       | 1e-26   |
| Cytoplasm, Ribo0<br>exonic m6A     |       | 1e-646  |
| Cytoplasm, Ribo0<br>intronic m6A   |       | 1e-34   |
| Cytoplasm, PolyA+<br>exonic m6A    |       | 1e-668  |
| Cytoplasm, PolyA+<br>intronic m6A  |       | 1e-30   |

- exonic m6As
- intron m6A: CA-RNA only
- intron m6A: conserved in other fractions

CA-RNA, Ribo0

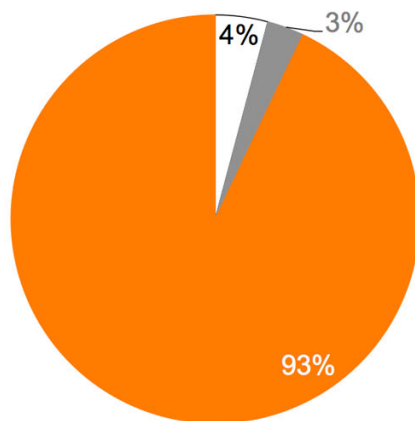

|   |  |        |
|---|--|--------|
| ■ |  | 1e-480 |
| □ |  | 1e-35  |
| ■ |  | 1e-27  |

FigS3

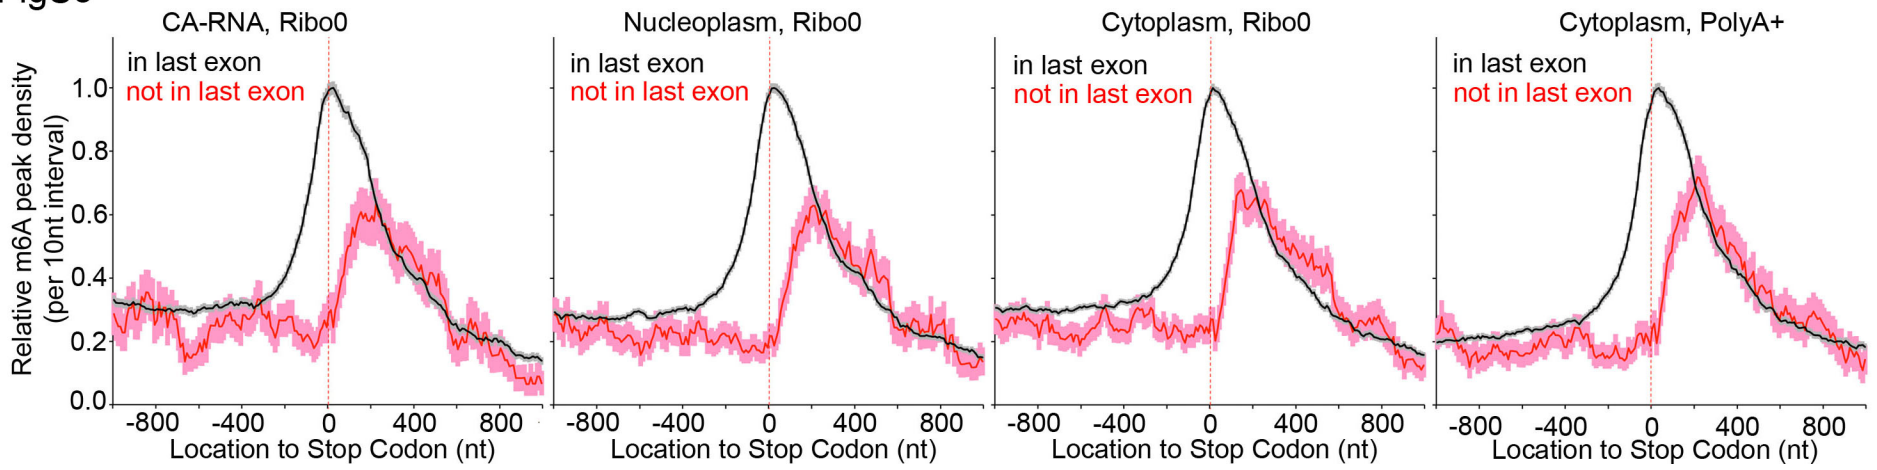

FigS4

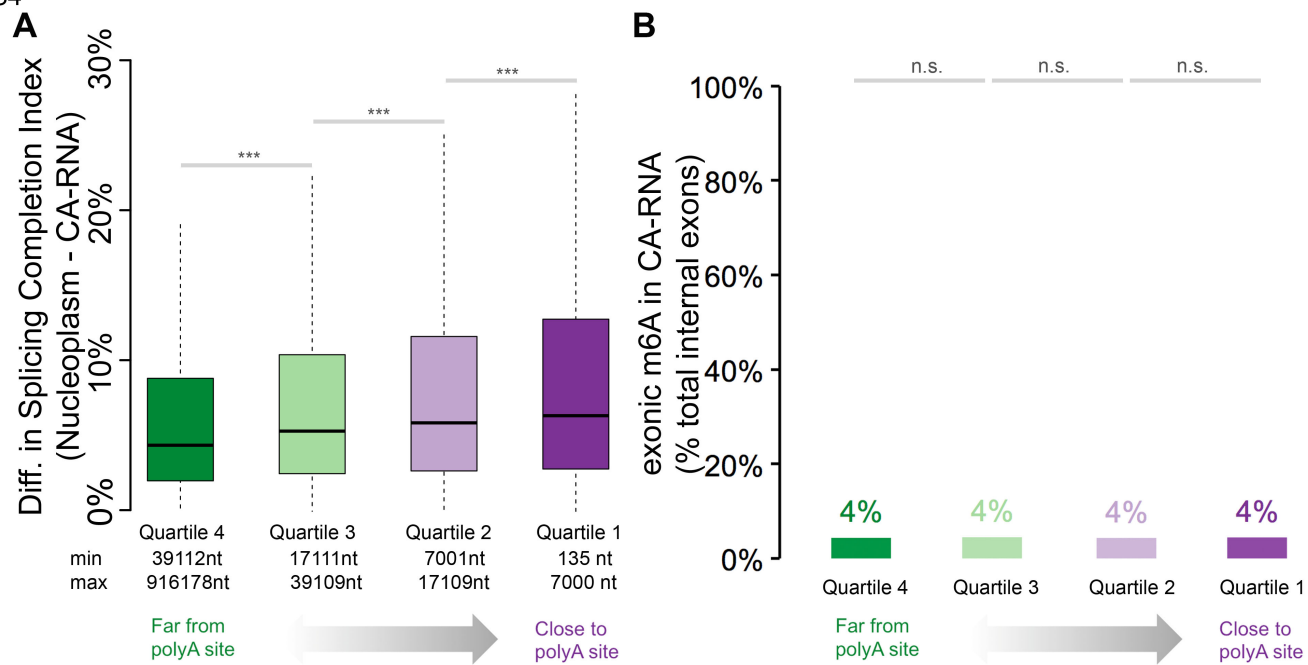

FigS5

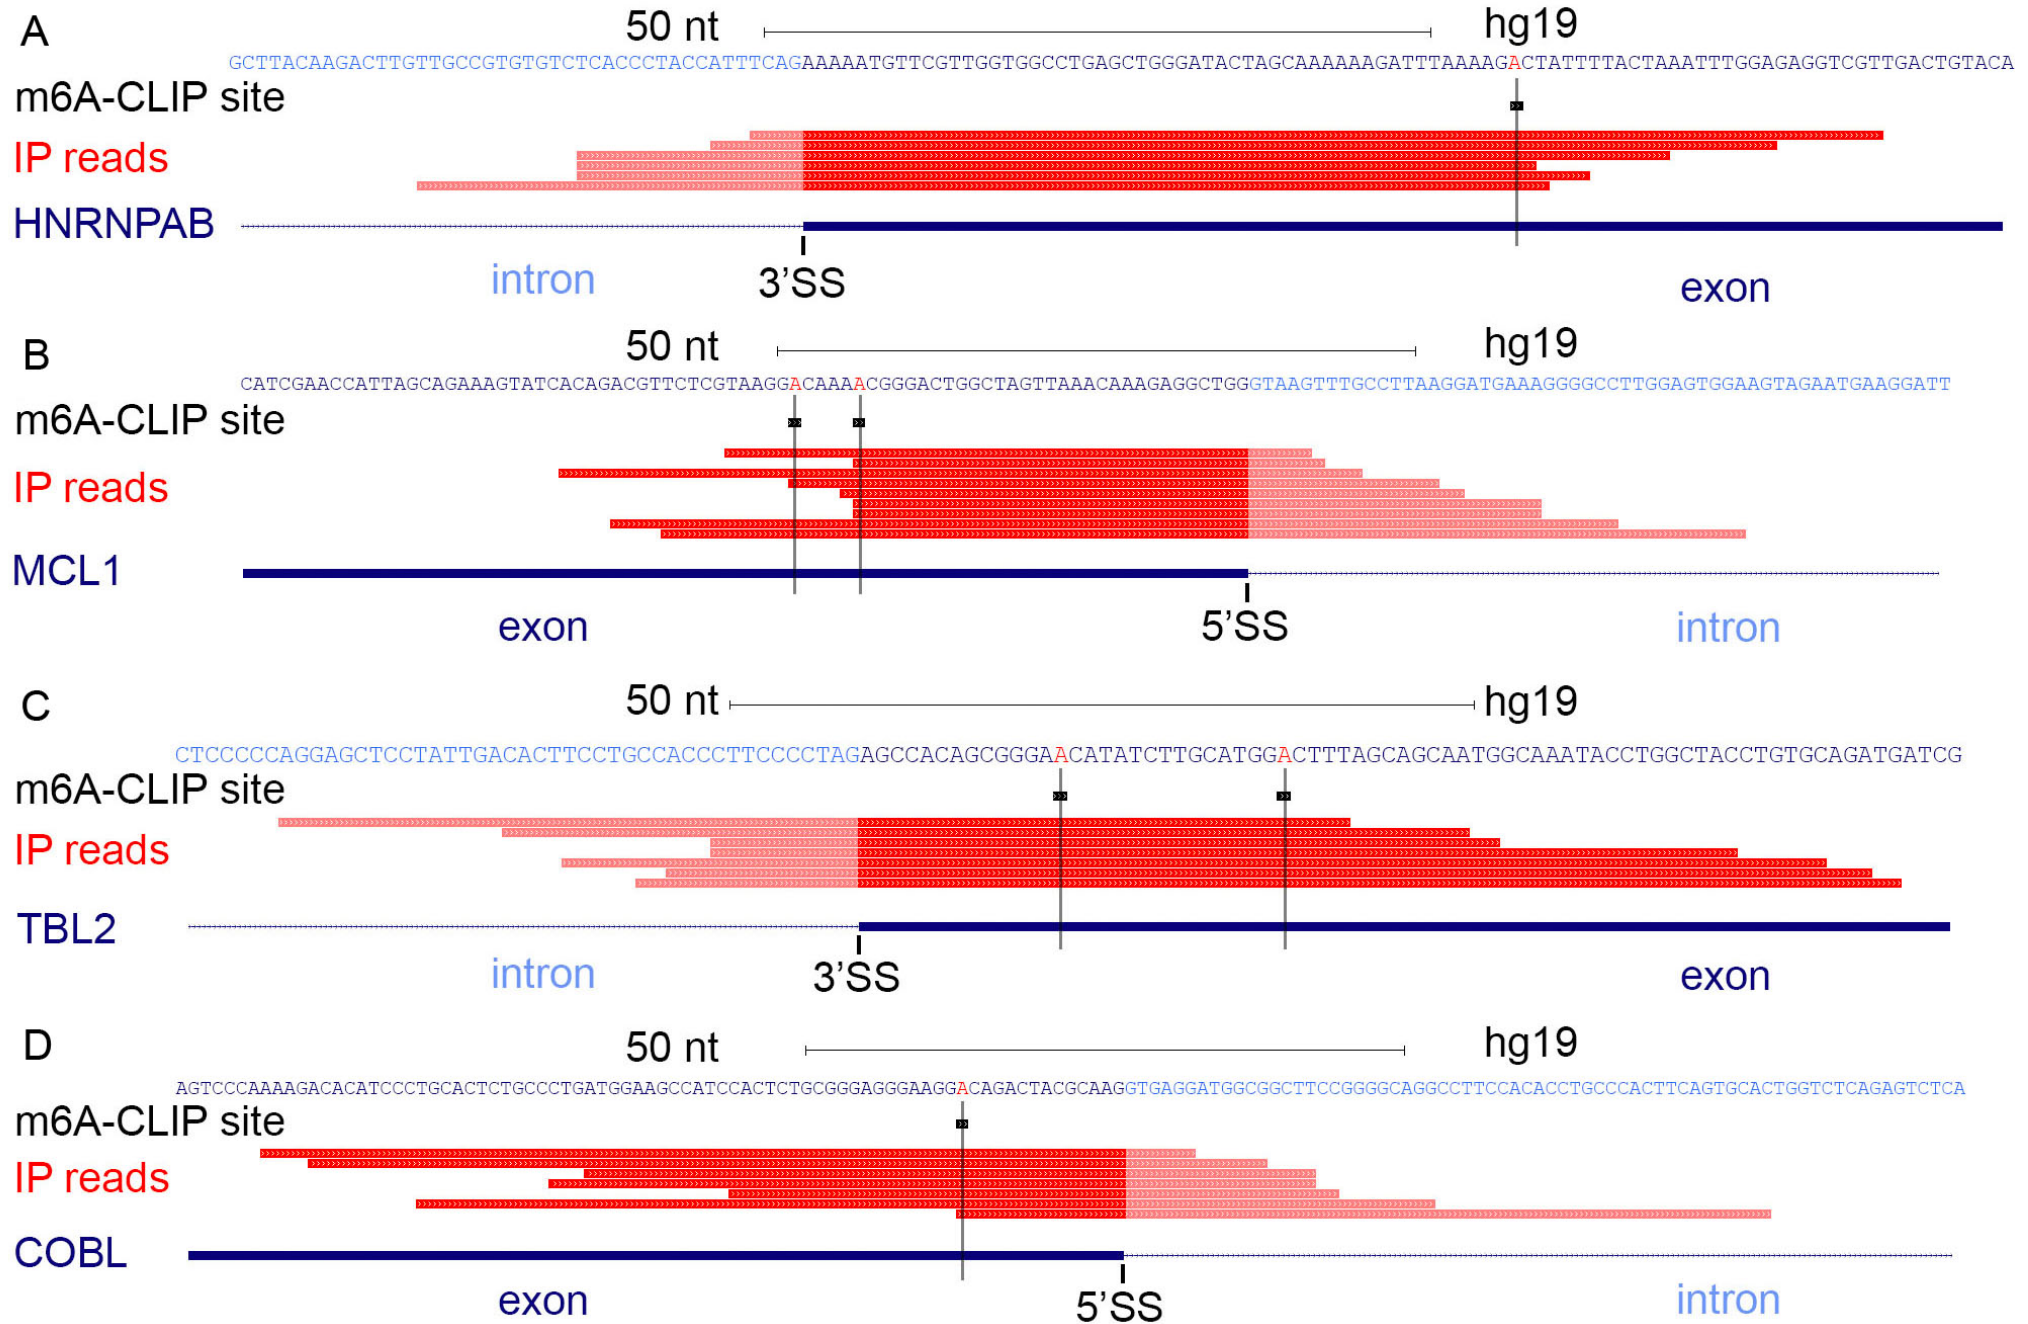

FigS6

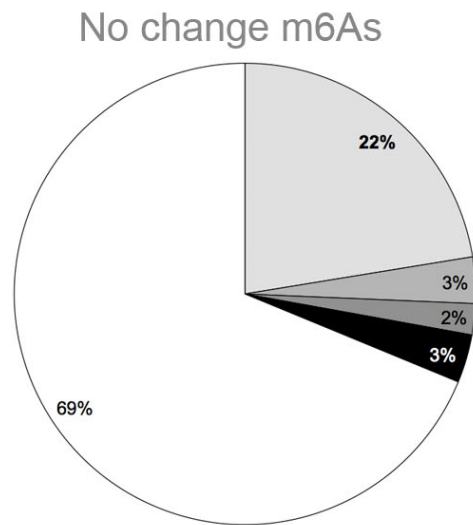

- internal constitutive exons
- internal cassette exons
- internal 5'ss exons
- internal 3'ss exons
- other exons

CA-RNA higher m6As

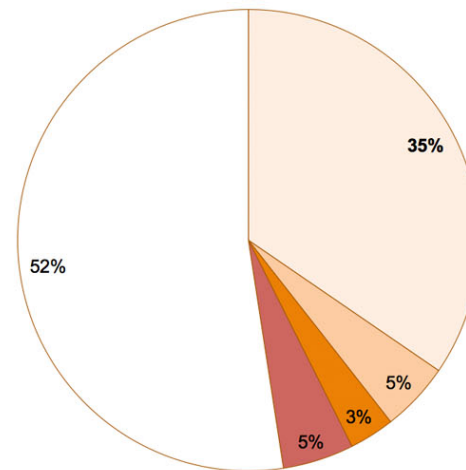

- internal constitutive exons
- internal cassette exons
- internal 5'ss exons
- internal 3'ss exons
- other exons

FigS7

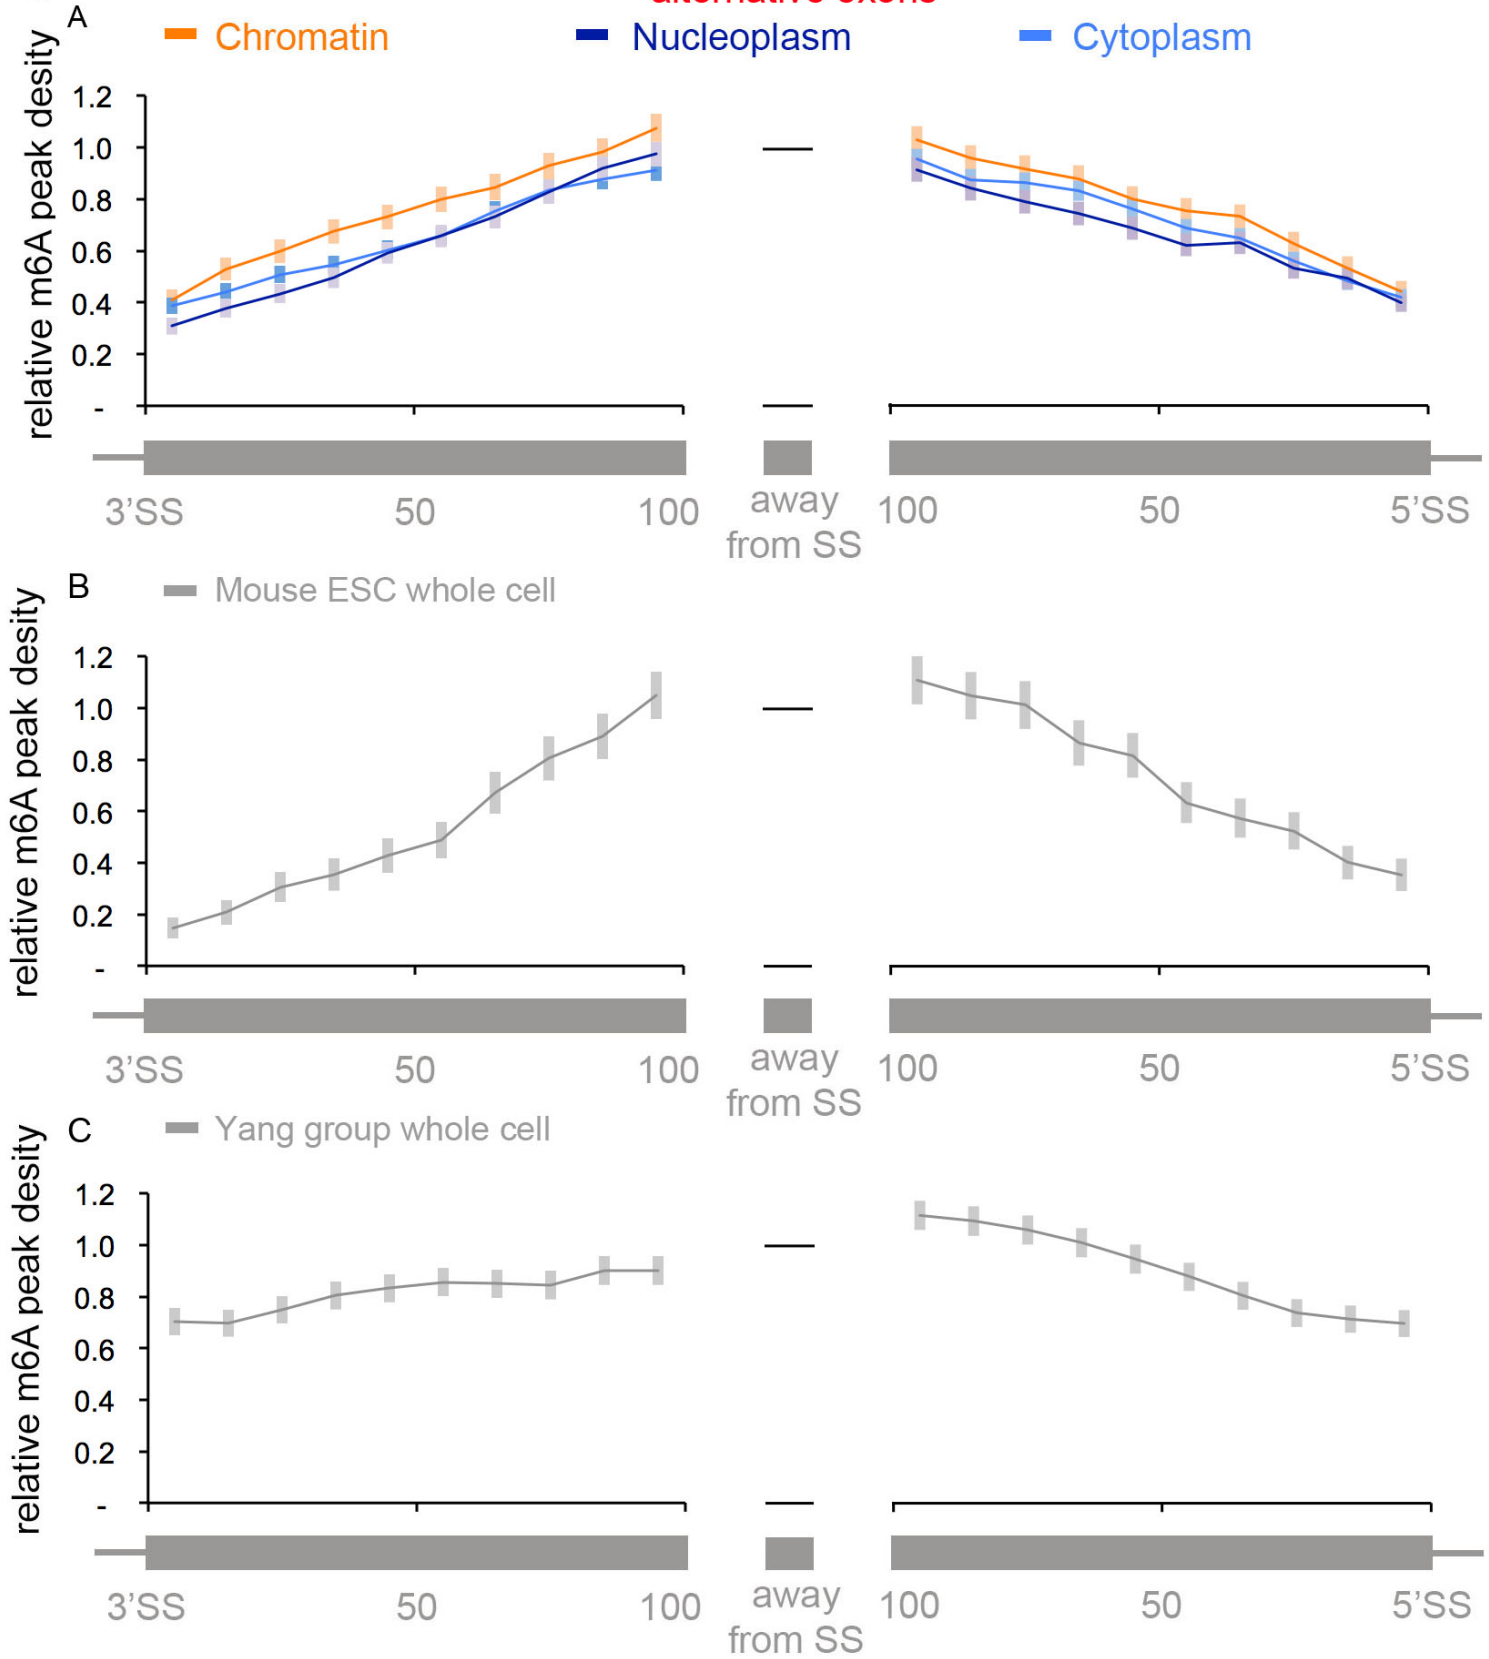



FigS8

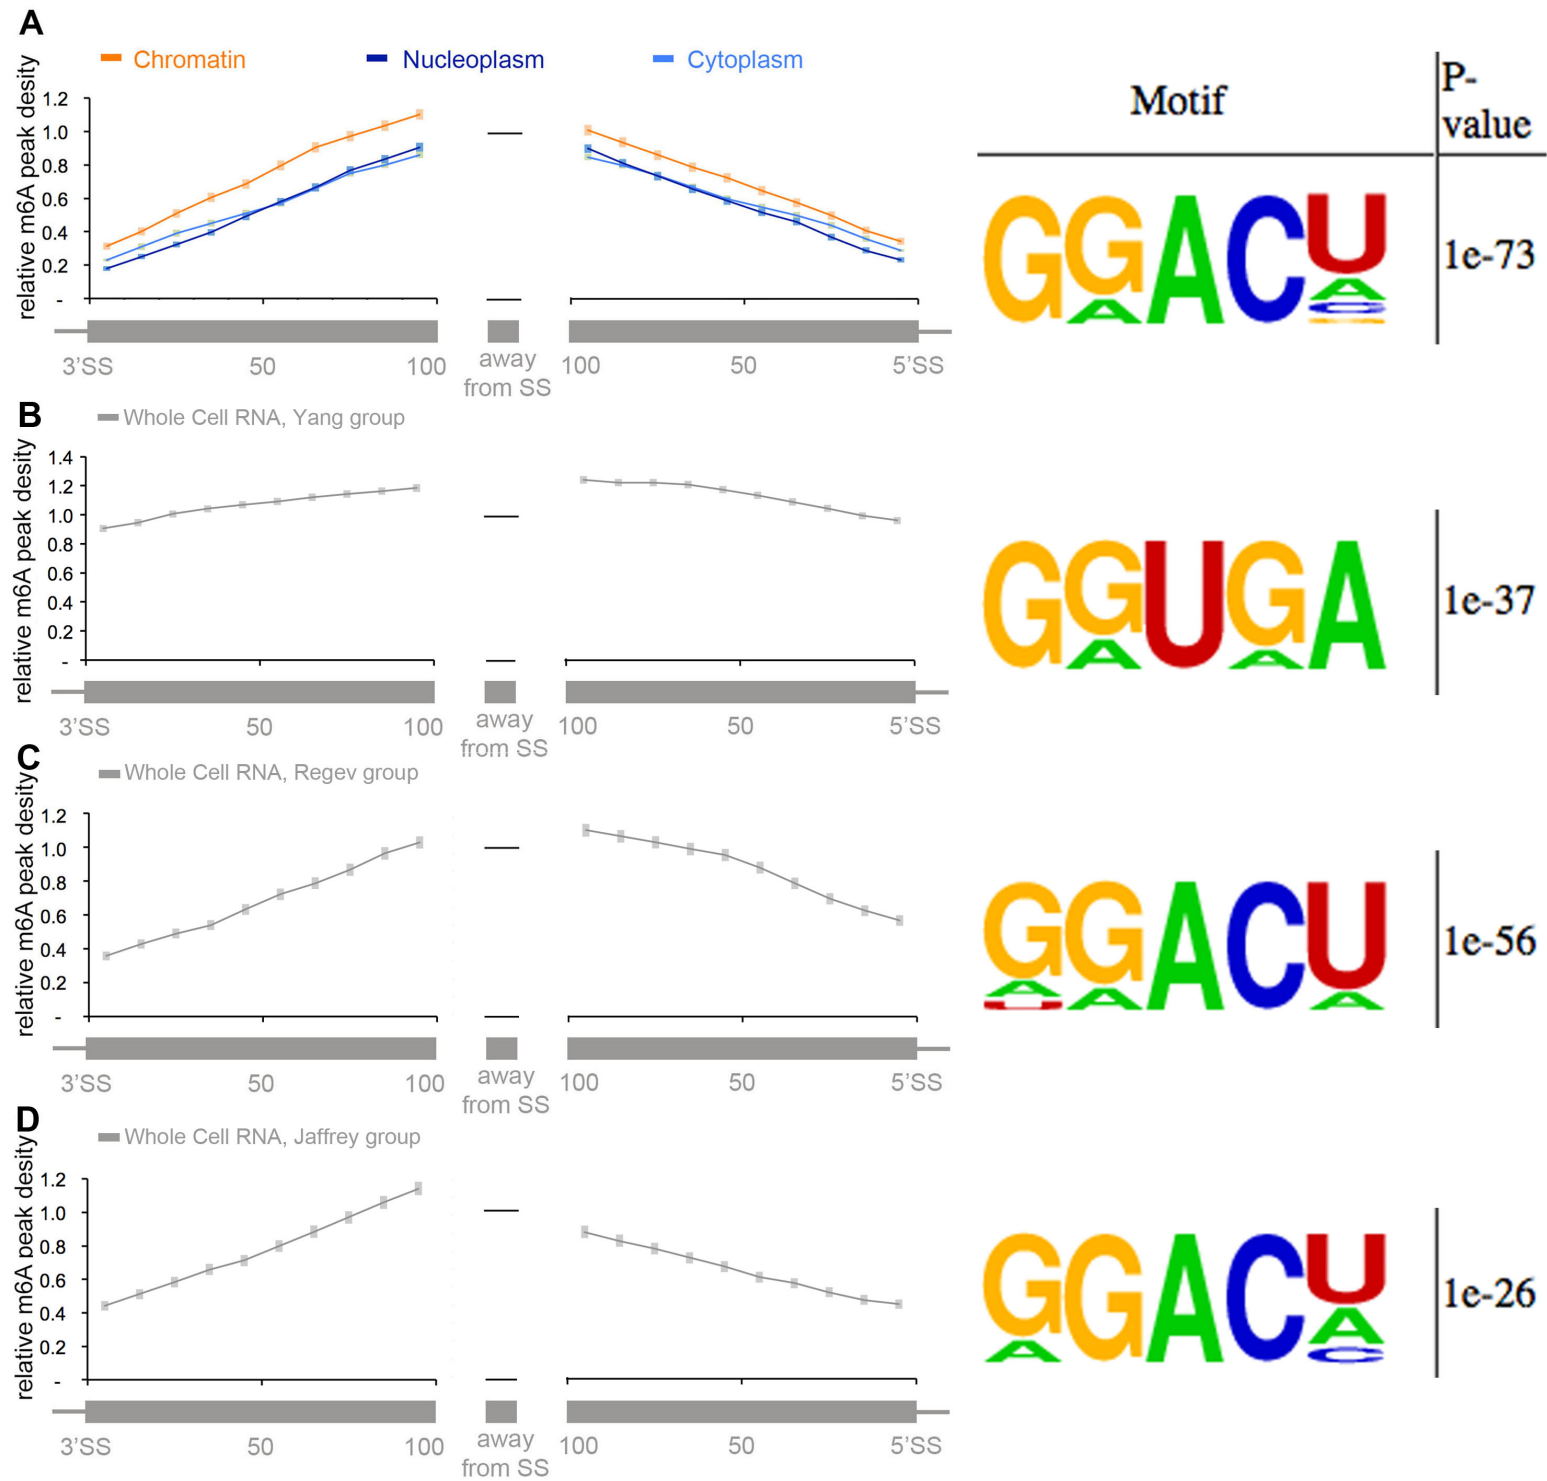

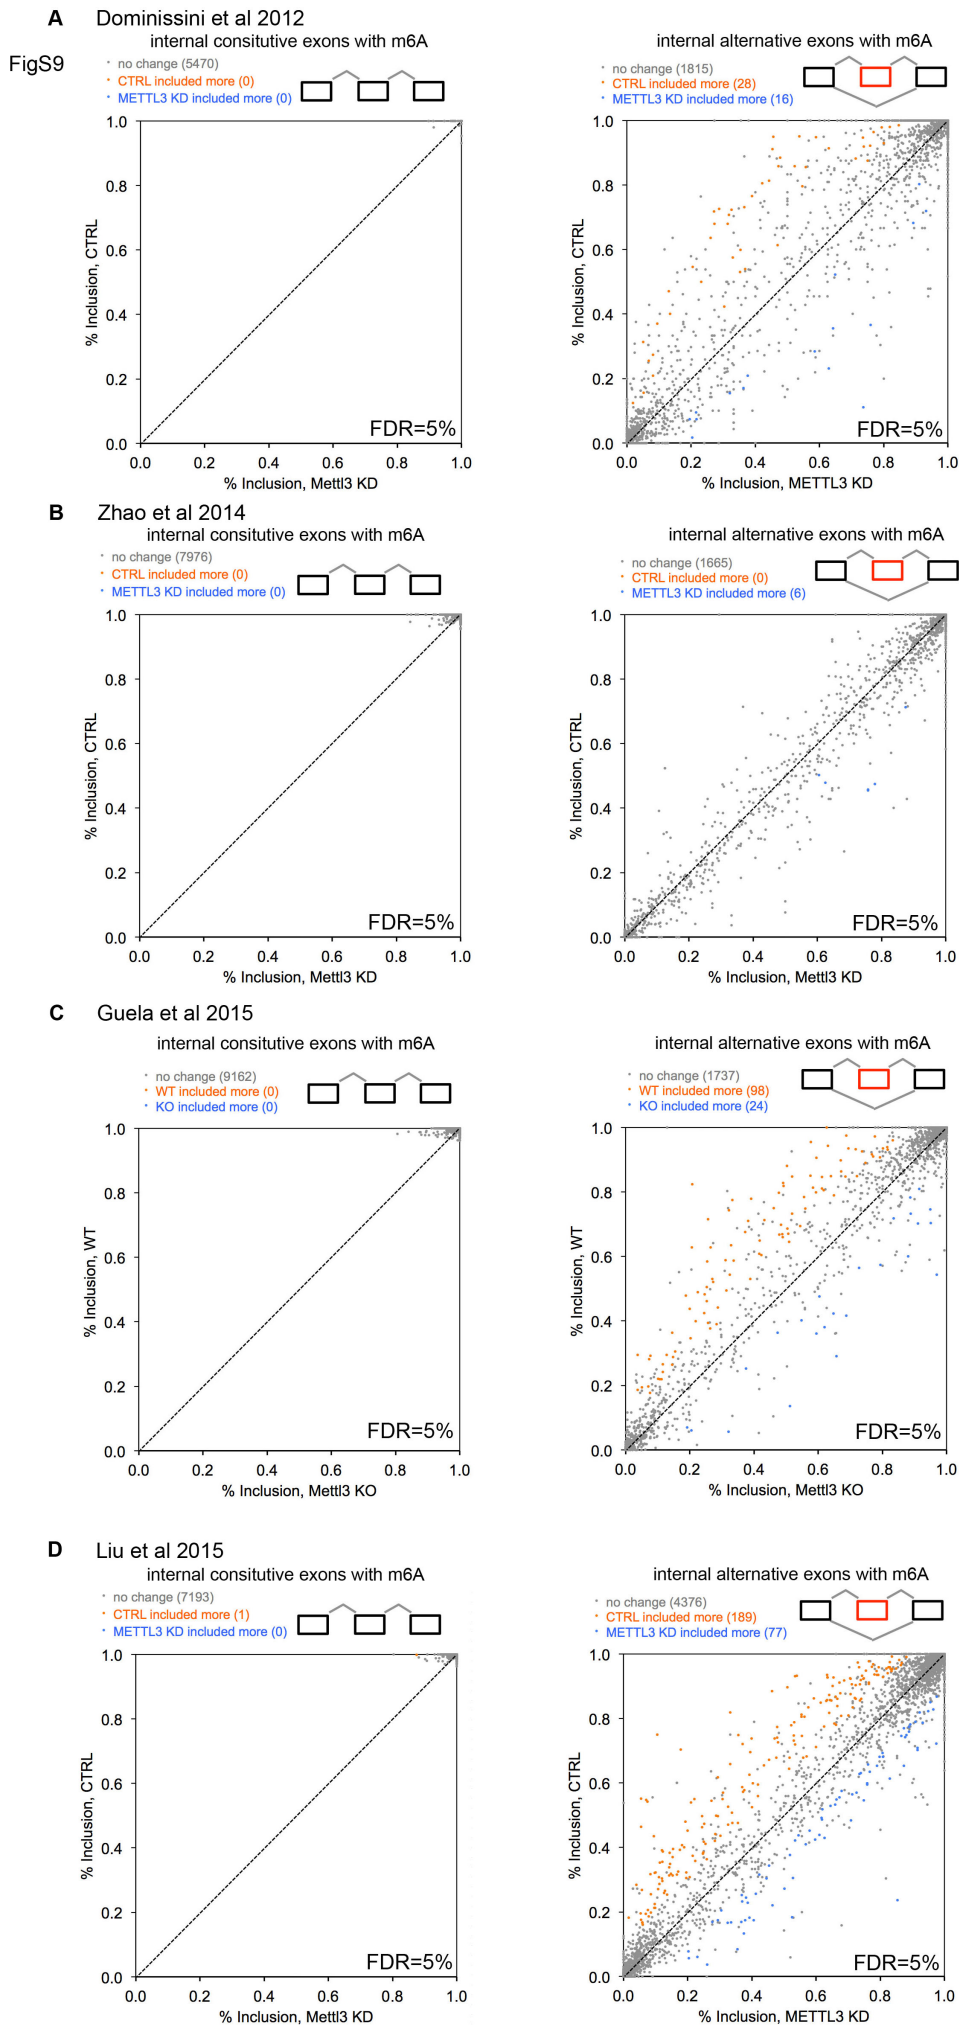



FigS10

HeLa cell  
A  $T_{1/2}$  from Tani *et al* 2012

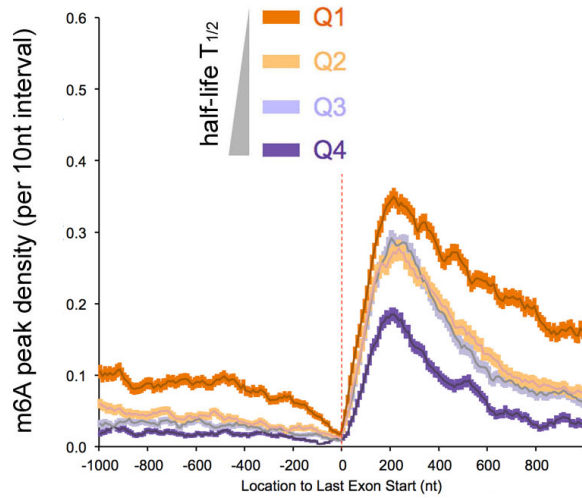

HeLa cell  
B  $T_{1/2}$  from Yang *et al* 2003

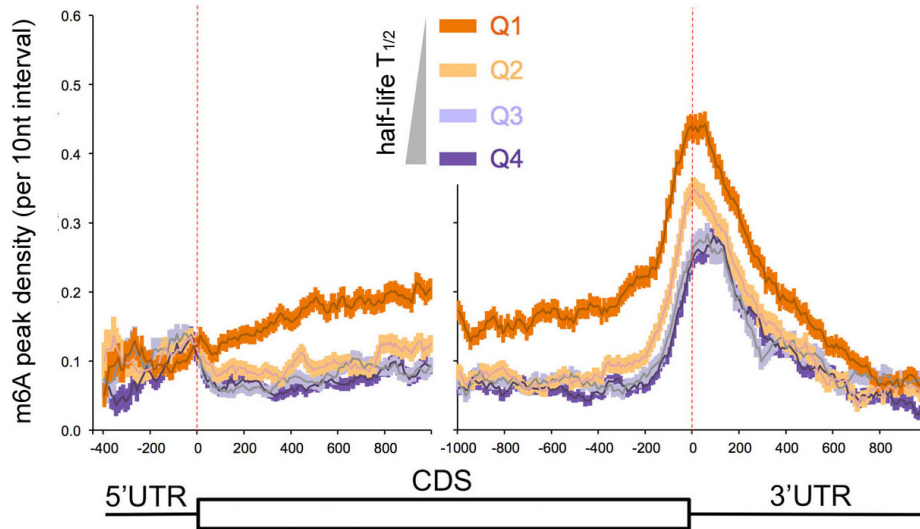

C mouse ES cell

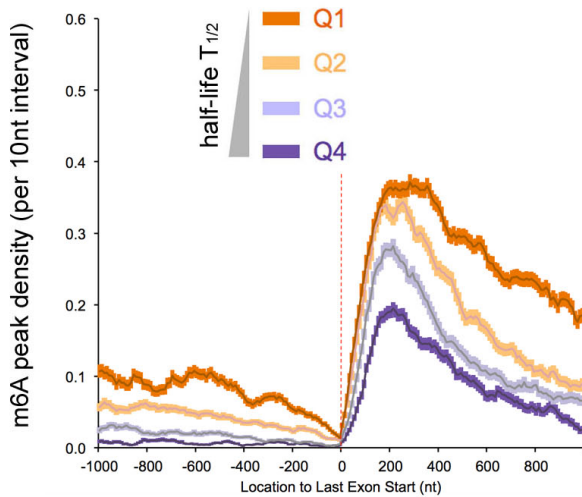

FigS11

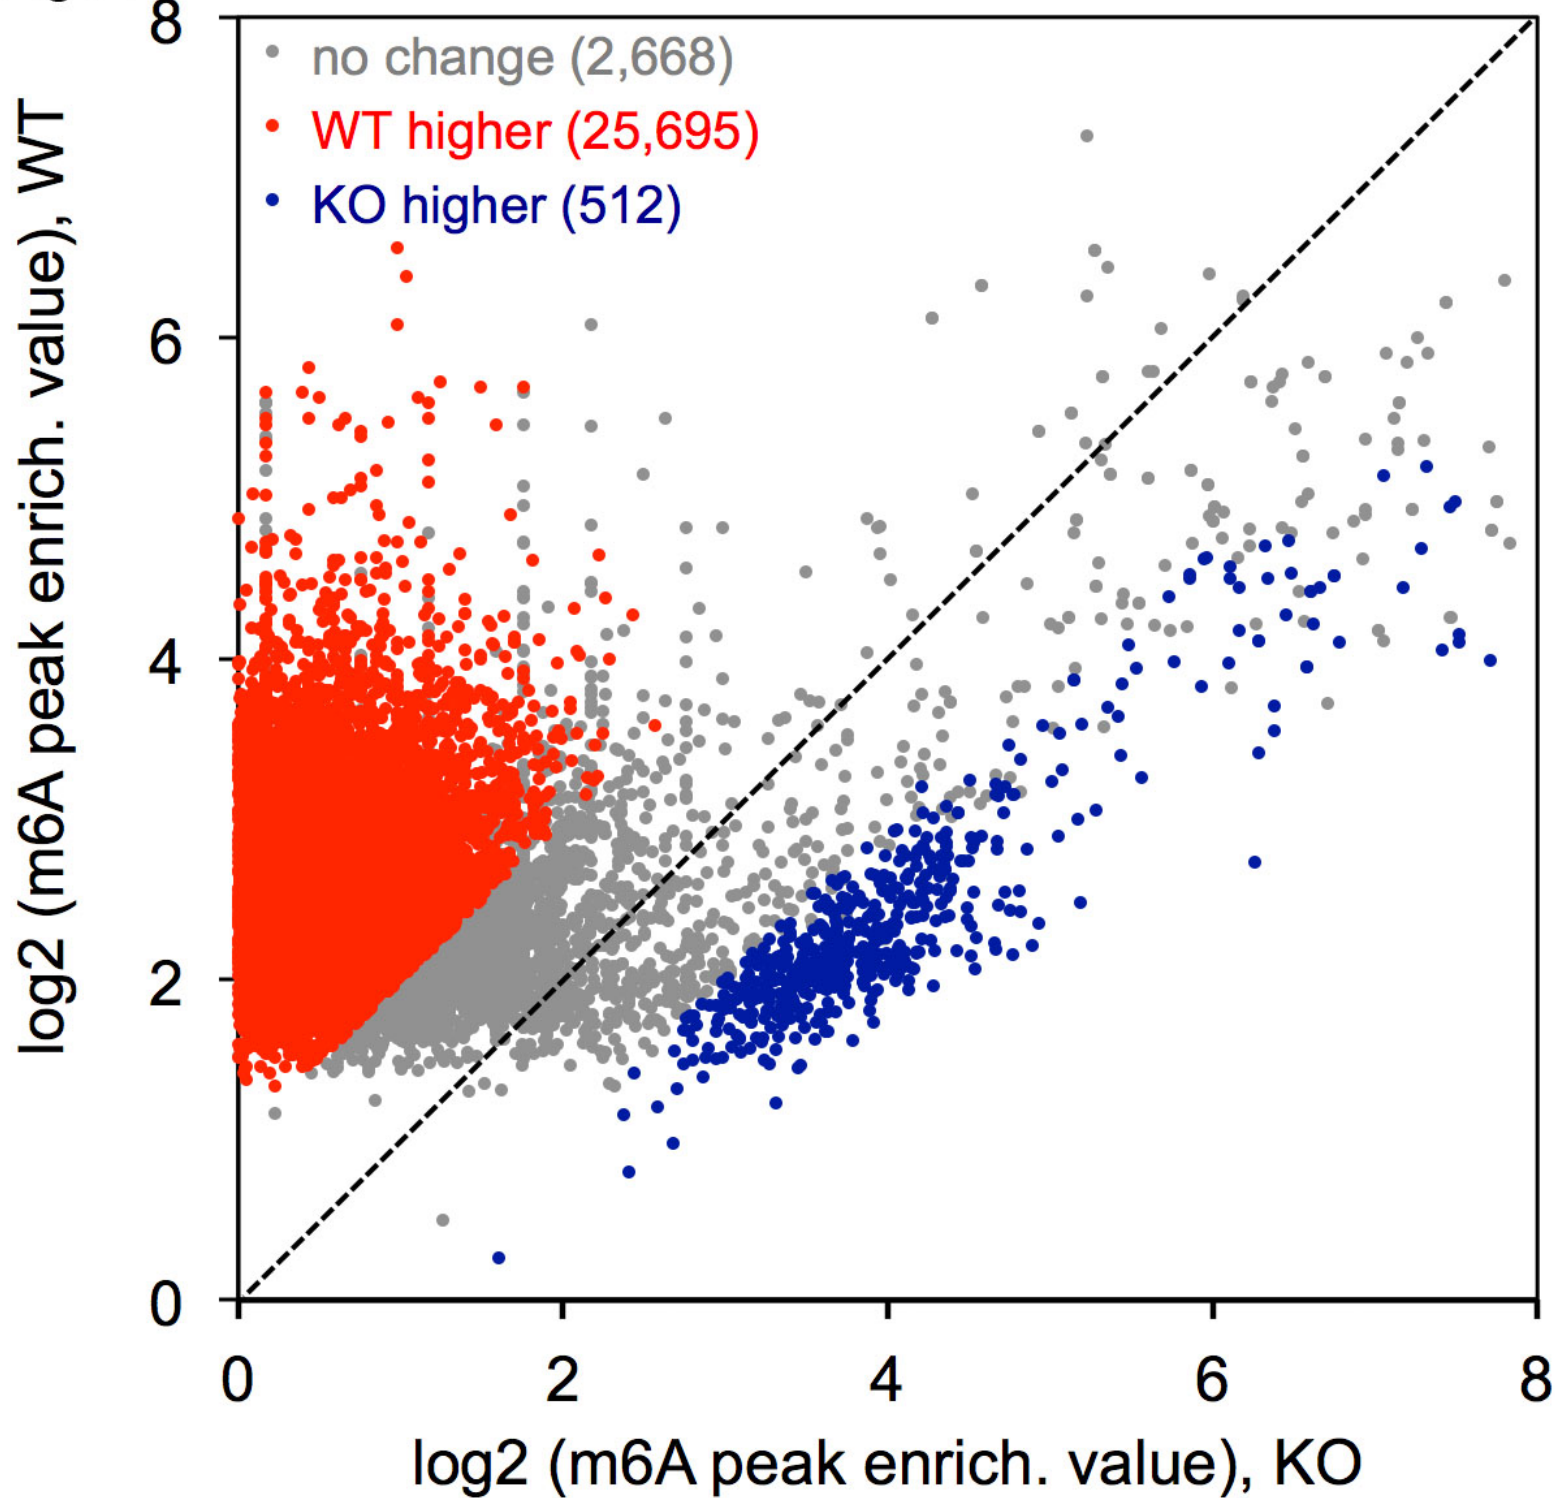

FigS12

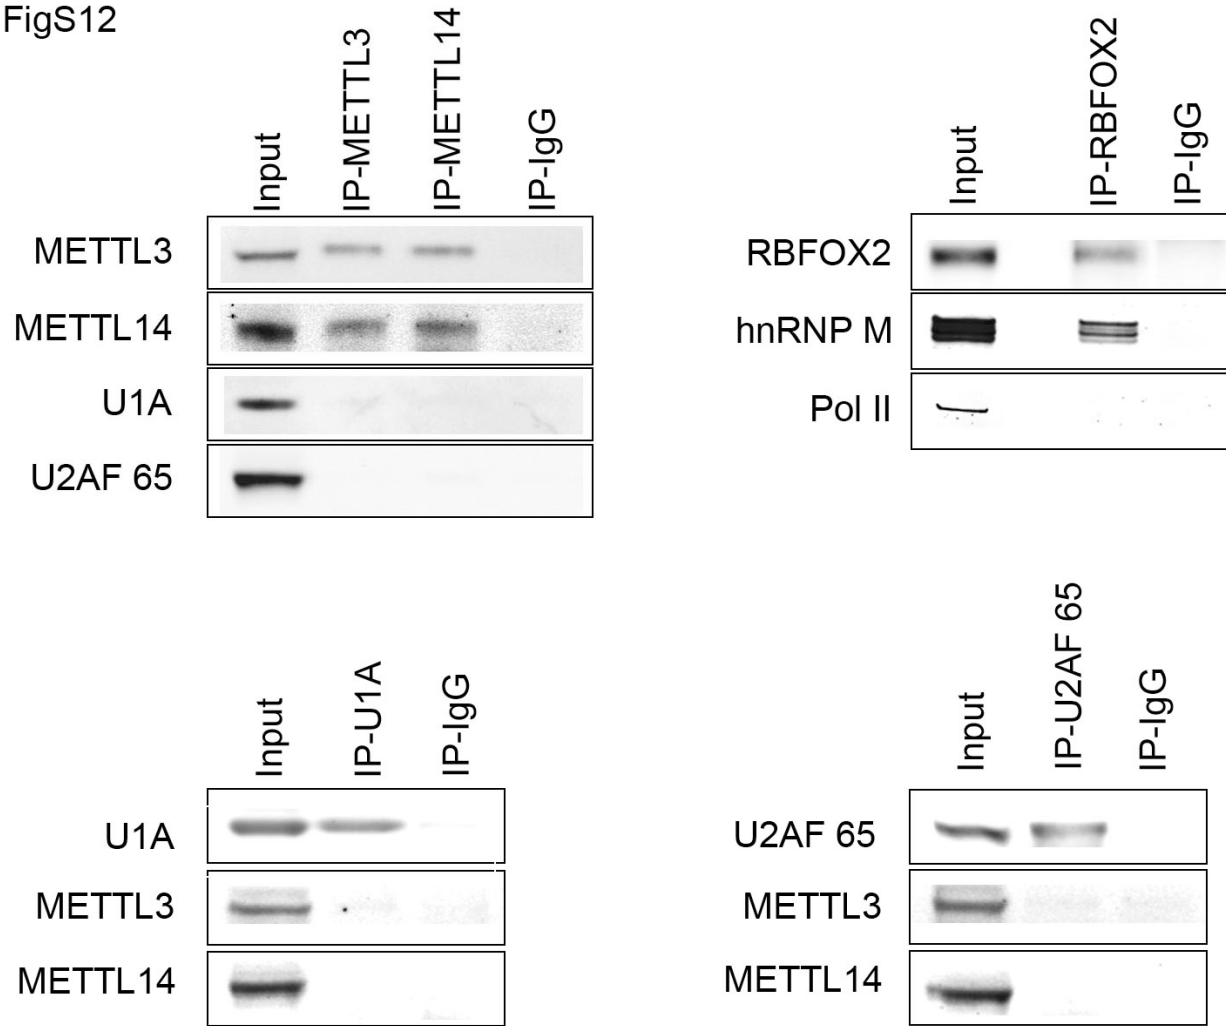

**Supplemental Table 1.** List of m6A sites that are nearby splice sites and yield m6A-containing exon-intron junction fragments in nascent RNA

|    | <b>m6A site location</b>    | <b>internal exon location</b> | <b>number of pre-mRNA reads containing m6A</b> |
|----|-----------------------------|-------------------------------|------------------------------------------------|
| 1  | chr12:+:53689670-53689671   | chr12:+:53689622-53689725     | 23                                             |
| 2  | chr22:+:45127624-45127625   | chr22:+:45127609-45127701     | 20                                             |
| 3  | chr11:+:12696956-12696957   | chr11:+:12696955-12697108     | 18                                             |
| 4  | chr17:-:39967420-39967421   | chr17:-:39967383-39967536     | 18                                             |
| 5  | chr14:+:20937680-20937681   | chr14:+:20937485-20937694     | 14                                             |
| 6  | chr17:+:17071212-17071213   | chr17:+:17067422-17071229     | 13                                             |
| 7  | chr2:+:232576639-232576640  | chr2:+:232576596-232576693    | 13                                             |
| 8  | chr2:+:232576639-232576640  | chr2:+:232576599-232576693    | 13                                             |
| 9  | chr17:-:39967420-39967421   | chr17:-:39967383-39967536     | 12                                             |
| 10 | chr2:+:85133207-85133208    | chr2:+:85133126-85133241      | 12                                             |
| 11 | chr19:+:11216252-11216253   | chr19:+:11215895-11216276     | 11                                             |
| 12 | chr11:-:10827564-10827565   | chr11:-:10827453-10827594     | 11                                             |
| 13 | chr12:-:115118716-115118717 | chr12:-:115118683-115118951   | 11                                             |
| 14 | chr2:+:232576639-232576640  | chr2:+:232576596-232576693    | 10                                             |
| 15 | chr2:+:232576639-232576640  | chr2:+:232576599-232576693    | 10                                             |
| 16 | chr5:-:40834341-40834342    | chr5:-:40834282-40834367      | 10                                             |
| 17 | chr5:+:177632031-177632032  | chr5:+:177631815-177632047    | 10                                             |
| 18 | chr19:+:11216243-11216244   | chr19:+:11215895-11216276     | 9                                              |
| 19 | chr1:-:150550749-150550750  | chr1:-:150550719-150550967    | 9                                              |
| 20 | chr11:-:2972531-2972532     | chr11:-:2972488-2972545       | 9                                              |
| 21 | chr11:+:65408308-65408309   | chr11:+:65408301-65409071     | 9                                              |
| 22 | chr18:-:692840-692841       | chr18:-:692769-693175         | 9                                              |
| 23 | chr11:-:61732894-61732895   | chr11:-:61732840-61733049     | 8                                              |
| 24 | chr11:-:61732894-61732895   | chr11:-:61732840-61732987     | 8                                              |
| 25 | chr17:-:74719899-74719900   | chr17:-:74719853-74720140     | 8                                              |
| 26 | chr16:+:731467-731468       | chr16:+:731437-731603         | 8                                              |
| 27 | chr12:+:104325378-104325379 | chr12:+:104325298-104325401   | 8                                              |
| 28 | chr7:-:72988438-72988439    | chr7:-:72988267-72988452      | 7                                              |
| 29 | chr7:-:72988423-72988424    | chr7:-:72988267-72988452      | 7                                              |
| 30 | chr7:-:51095421-51095422    | chr7:-:51095408-51097288      | 7                                              |
| 31 | chr14:-:81743267-81743268   | chr14:-:81743244-81745083     | 7                                              |
| 32 | chr8:-:62566217-62566218    | chr8:-:62566126-62566219      | 7                                              |
| 33 | chr1:-:153926080-153926081  | chr1:-:153926013-153926082    | 7                                              |
| 34 | chr6:-:74229645-74229646    | chr6:-:74229605-74229779      | 7                                              |
| 35 | chr11:-:122929365-122929366 | chr11:-:122929339-122929538   | 7                                              |
| 36 | chr2:+:85133201-85133202    | chr2:+:85133126-85133241      | 7                                              |
| 37 | chr9:-:130211579-130211580  | chr9:-:130211559-130211641    | 7                                              |
| 38 | chr9:+:131453502-131453503  | chr9:+:131453448-131453506    | 7                                              |
| 39 | chr7:-:99690932-99690933    | chr7:-:99690914-99691024      | 6                                              |
| 40 | chr8:-:144696982-144696983  | chr8:-:144696956-144697085    | 6                                              |
| 41 | chr8:+:42924789-42924790    | chr8:+:42924697-42924802      | 6                                              |
| 42 | chr8:+:146062888-146062889  | chr8:+:146062775-146062892    | 6                                              |
| 43 | chr8:+:146062888-146062889  | chr8:+:146062778-146062892    | 6                                              |
| 44 | chr19:-:3981367-3981368     | chr19:-:3981336-3981450       | 6                                              |
| 45 | chr17:-:26960603-26960604   | chr17:-:26960566-26960769     | 6                                              |
| 46 | chr17:-:62500423-62500424   | chr17:-:62500339-62500436     | 6                                              |
| 47 | chr16:+:2946752-2946753     | chr16:+:2946352-2946772       | 6                                              |
| 48 | chr12:+:123467063-123467064 | chr12:+:123467015-123467085   | 6                                              |
| 49 | chr12:+:123467055-123467056 | chr12:+:123467015-123467085   | 6                                              |
| 50 | chr12:+:104332117-104332118 | chr12:+:104332117-104332237   | 6                                              |
| 51 | chr15:+:44084518-44084519   | chr15:+:44084173-44084581     | 6                                              |
| 52 | chr15:+:44085250-44085251   | chr15:+:44085172-44085281     | 6                                              |
| 53 | chr4:-:1836593-1836594      | chr4:-:1836571-1836709        | 6                                              |
| 54 | chr2:-:27356182-27356183    | chr2:-:27355984-27356205      | 6                                              |
| 55 | chr2:-:242194985-242194986  | chr2:-:242194788-242194995    | 6                                              |
| 56 | chr2:+:54853351-54853352    | chr2:+:54853068-54853371      | 6                                              |

|     |                             |                             |   |
|-----|-----------------------------|-----------------------------|---|
| 57  | chr9:-:130211590-130211591  | chr9:-:130211559-130211641  | 6 |
| 58  | chr9+:131453473-131453474   | chr9+:131453448-131453506   | 6 |
| 59  | chr9+:135555176-135555177   | chr9+:135553363-135555190   | 6 |
| 60  | chr9+:131453473-131453474   | chr9+:131453448-131453506   | 6 |
| 61  | chr13:-:107211857-107211858 | chr13:-:107211779-107212005 | 6 |
| 62  | chr5+:177632895-177632896   | chr5+:177632842-177633011   | 6 |
| 63  | chr14:-:68159674-68159675   | chr14:-:68159650-68159769   | 5 |
| 64  | chr14+:102510803-102510804  | chr14+:102510610-102510828  | 5 |
| 65  | chr8+:146062888-146062889   | chr8+:146062775-146062892   | 5 |
| 66  | chr8+:146062888-146062889   | chr8+:146062778-146062892   | 5 |
| 67  | chr19:-:3981367-3981368     | chr19:-:3981336-3981450     | 5 |
| 68  | chr19+:13876787-13876788    | chr19+:13876767-13876943    | 5 |
| 69  | chr19+:11560216-11560217    | chr19+:11560080-11560243    | 5 |
| 70  | chr19+:13869791-13869792    | chr19+:13869681-13869824    | 5 |
| 71  | chr19+:11560207-11560208    | chr19+:11560080-11560243    | 5 |
| 72  | chr1:-:150550768-150550769  | chr1:-:150550719-150550967  | 5 |
| 73  | chr1+:63836705-63836706     | chr1+:63836441-63836730     | 5 |
| 74  | chr1+:156025166-156025167   | chr1+:156025053-156025216   | 5 |
| 75  | chr1+:150316939-150316940   | chr1+:150316909-150317023   | 5 |
| 76  | chr6+:33170190-33170191     | chr6+:33170039-33170204     | 5 |
| 77  | chr11:-:118888710-118888711 | chr11:-:118888667-118888763 | 5 |
| 78  | chr11+:75111836-75111837    | chr11+:75111737-75111868    | 5 |
| 79  | chr17:-:17720904-17720905   | chr17:-:17720861-17721230   | 5 |
| 80  | chr17+:73664698-73664699    | chr17+:73664595-73664705    | 5 |
| 81  | chr3:-:101401631-101401632  | chr3:-:101401614-101401751  | 5 |
| 82  | chr3:-:101401625-101401626  | chr3:-:101401614-101401751  | 5 |
| 83  | chr3+:52721269-52721270     | chr3+:52721261-52721399     | 5 |
| 84  | chr12:-:109530707-109530708 | chr12:-:109530311-109530742 | 5 |
| 85  | chr15+:44084538-44084539    | chr15+:44084173-44084581    | 5 |
| 86  | chr2:-:232326270-232326271  | chr2:-:232326250-232326728  | 5 |
| 87  | chr2:-:232326264-232326265  | chr2:-:232326250-232326728  | 5 |
| 88  | chr9:-:123550501-123550502  | chr9:-:123550046-123550556  | 5 |
| 89  | chr9:-:123550522-123550523  | chr9:-:123550046-123550556  | 5 |
| 90  | chr10:-:101373500-101373501 | chr10:-:101373452-101373681 | 5 |
| 91  | chr7:-:151859336-151859337  | chr7:-:151859201-151860911  | 4 |
| 92  | chr22:-:36900168-36900169   | chr22:-:36900144-36900414   | 4 |
| 93  | chr8+:145533517-145533518   | chr8+:145533457-145533582   | 4 |
| 94  | chr8+:145745644-145745645   | chr8+:145745621-145746206   | 4 |
| 95  | chr19:-:3981413-3981414     | chr19:-:3981336-3981450     | 4 |
| 96  | chr19+:13051355-13051356    | chr19+:13051354-13051468    | 4 |
| 97  | chr19+:13051382-13051383    | chr19+:13051354-13051468    | 4 |
| 98  | chr19+:13051382-13051383    | chr19+:13051354-13051468    | 4 |
| 99  | chr1:-:94047917-94047918    | chr1:-:94047857-94048510    | 4 |
| 100 | chr6:-:52132745-52132746    | chr6:-:52132662-52132766    | 4 |
| 101 | chr6+:33170383-33170384     | chr6+:33170336-33170477     | 4 |
| 102 | chr11:-:10825848-10825849   | chr11:-:10825833-10825965   | 4 |
| 103 | chr11:-:61732877-61732878   | chr11:-:61732840-61733049   | 4 |
| 104 | chr11:-:61732877-61732878   | chr11:-:61732840-61732987   | 4 |
| 105 | chr11:-:10825854-10825855   | chr11:-:10825833-10825965   | 4 |
| 106 | chr11+:71187117-71187118    | chr11+:71187078-71188484    | 4 |
| 107 | chr11+:73957120-73957121    | chr11+:73957120-73957250    | 4 |
| 108 | chr11+:67018227-67018228    | chr11+:67017556-67018269    | 4 |
| 109 | chr17:-:26888616-26888617   | chr17:-:26888439-26888647   | 4 |
| 110 | chr17:-:3592021-3592022     | chr17:-:3591919-3592053     | 4 |
| 111 | chr17:-:40474307-40474308   | chr17:-:40474299-40474512   | 4 |
| 112 | chr17:-:40474307-40474308   | chr17:-:40474302-40474512   | 4 |
| 113 | chr17:-:26888645-26888646   | chr17:-:26888439-26888647   | 4 |
| 114 | chr17:-:73126895-73126896   | chr17:-:73126847-73126962   | 4 |
| 115 | chr16:-:88787146-88787147   | chr16:-:88787023-88787156   | 4 |
| 116 | chr12:-:109530687-109530688 | chr12:-:109530311-109530742 | 4 |
| 117 | chr12+:104721293-104721294  | chr12+:104721292-104721449  | 4 |

|     |                             |                             |   |
|-----|-----------------------------|-----------------------------|---|
| 118 | chr12:+:104332228-104332229 | chr12:+:104332117-104332237 | 4 |
| 119 | chr12:+:112183967-112183968 | chr12:+:112183947-112184088 | 4 |
| 120 | chr12:+:98925604-98925605   | chr12:+:98925457-98925616   | 4 |
| 121 | chr12:+:52629137-52629138   | chr12:+:52628938-52629150   | 4 |
| 122 | chr15:+:91500839-91500840   | chr15:+:91500833-91500955   | 4 |
| 123 | chr15:+:44084530-44084531   | chr15:+:44084173-44084581   | 4 |
| 124 | chr2:+:234363488-234363489  | chr2:+:234363408-234363519  | 4 |
| 125 | chr2:+:220099603-220099604  | chr2:+:220099547-220100034  | 4 |
| 126 | chr2:+:220099612-220099613  | chr2:+:220099547-220100034  | 4 |
| 127 | chr2:+:54883074-54883075    | chr2:+:54883050-54883135    | 4 |
| 128 | chr9:-:19376512-19376513    | chr9:-:19376491-19376649    | 4 |
| 129 | chr10:-:97373613-97373614   | chr10:-:97373498-97373620   | 4 |
| 130 | chr5:+:36153096-36153097    | chr5:+:36152872-36153144    | 4 |
| 131 | chr7:+:115890518-115890519  | chr7:+:115890214-115890550  | 3 |
| 132 | chr7:+:142961238-142961239  | chr7:+:142961178-142961260  | 3 |
| 133 | chr20:-:57571831-57571832   | chr20:-:57571693-57571856   | 3 |
| 134 | chr20:-:57571839-57571840   | chr20:-:57571693-57571856   | 3 |
| 135 | chr22:-:39713520-39713521   | chr22:-:39713465-39713634   | 3 |
| 136 | chr22:+:42018035-42018036   | chr22:+:42017993-42018090   | 3 |
| 137 | chr14:+:102510791-102510792 | chr14:+:102510610-102510828 | 3 |
| 138 | chr14:+:102510761-102510762 | chr14:+:102510610-102510828 | 3 |
| 139 | chr8:-:99057121-99057122    | chr8:-:99057054-99057316    | 3 |
| 140 | chr8:-:62596744-62596745    | chr8:-:62596597-62596747    | 3 |
| 141 | chr8:+:145745675-145745676  | chr8:+:145745621-145746206  | 3 |
| 142 | chr8:+:143783017-143783018  | chr8:+:143783017-143783131  | 3 |
| 143 | chr8:+:145745649-145745650  | chr8:+:145745621-145746206  | 3 |
| 144 | chr19:-:3981405-3981406     | chr19:-:3981336-3981450     | 3 |
| 145 | chr19:-:3783821-3783822     | chr19:-:3783811-3784031     | 3 |
| 146 | chr19:+:42373781-42373782   | chr19:+:42373768-42373823   | 3 |
| 147 | chr19:+:42373792-42373793   | chr19:+:42373768-42373823   | 3 |
| 148 | chr1:-:3703455-3703456      | chr1:-:3703412-3703874      | 3 |
| 149 | chr1:-:156713997-156713998  | chr1:-:156713954-156714140  | 3 |
| 150 | chr1:+:156701844-156701845  | chr1:+:156701782-156701907  | 3 |
| 151 | chr1:+:156701844-156701845  | chr1:+:156701782-156702265  | 3 |
| 152 | chr1:+:16202707-16202708    | chr1:+:16202696-16203173    | 3 |
| 153 | chr1:+:46033690-46033691    | chr1:+:46033653-46033849    | 3 |
| 154 | chr1:+:16202726-16202727    | chr1:+:16202696-16203173    | 3 |
| 155 | chr1:+:203652503-203652504  | chr1:+:203651869-203652526  | 3 |
| 156 | chr6:-:52132714-52132715    | chr6:-:52132662-52132766    | 3 |
| 157 | chr6:-:52132714-52132715    | chr6:-:52132662-52132766    | 3 |
| 158 | chr6:-:112017623-112017624  | chr6:-:112017479-112017659  | 3 |
| 159 | chr6:-:18264099-18264100    | chr6:-:18264073-18264227    | 3 |
| 160 | chr6:+:32940633-32940634    | chr6:+:32939371-32940704    | 3 |
| 161 | chr11:-:62445303-62445304   | chr11:-:62445252-62445304   | 3 |
| 162 | chr11:-:11888710-11888711   | chr11:-:118888634-118888763 | 3 |
| 163 | chr11:-:104839267-104839268 | chr11:-:104839245-104839455 | 3 |
| 164 | chr11:-:47445654-47445655   | chr11:-:47445596-47445734   | 3 |
| 165 | chr11:-:62334448-62334449   | chr11:-:62334277-62334482   | 3 |
| 166 | chr11:-:47493811-47493812   | chr11:-:47493742-47493909   | 3 |
| 167 | chr11:+:18425322-18425323   | chr11:+:18425240-18425358   | 3 |
| 168 | chr11:+:63960729-63960730   | chr11:+:63960549-63960759   | 3 |
| 169 | chr11:+:12697043-12697044   | chr11:+:12696955-12697108   | 3 |
| 170 | chr11:+:65347407-65347408   | chr11:+:65347406-65347460   | 3 |
| 171 | chr17:-:48227327-48227328   | chr17:-:48226507-48227383   | 3 |
| 172 | chr17:-:26918749-26918750   | chr17:-:26918715-26918890   | 3 |
| 173 | chr17:-:18156722-18156723   | chr17:-:18156614-18156772   | 3 |
| 174 | chr17:+:40689468-40689469   | chr17:+:40689415-40689563   | 3 |
| 175 | chr17:+:73702099-73702100   | chr17:+:73702087-73702172   | 3 |
| 176 | chr21:+:33036113-33036114   | chr21:+:33036102-33036199   | 3 |
| 177 | chr16:+:85698630-85698631   | chr16:+:85698620-85698734   | 3 |
| 178 | chr3:-:49160167-49160168    | chr3:-:49160136-49160485    | 3 |

|     |                             |                             |   |
|-----|-----------------------------|-----------------------------|---|
| 179 | chr3:-:156870915-156870916  | chr3:-:156870824-156870945  | 3 |
| 180 | chr3+:184042879-184042880   | chr3+:184042665-184042902   | 3 |
| 181 | chr3+:184042798-184042799   | chr3+:184042665-184042902   | 3 |
| 182 | chr3+:128973514-128973515   | chr3+:128973510-128973586   | 3 |
| 183 | chr12:-:109530707-109530708 | chr12:-:109530311-109530742 | 3 |
| 184 | chr12:-:6711578-6711579     | chr12:-:6711541-6711663     | 3 |
| 185 | chr12:-:109530678-109530679 | chr12:-:109530311-109530742 | 3 |
| 186 | chr12+:6878769-6878770      | chr12+:6878768-6878840      | 3 |
| 187 | chr12+:112578976-112578977  | chr12+:112578622-112579028  | 3 |
| 188 | chr12+:98925592-98925593    | chr12+:98925457-98925616    | 3 |
| 189 | chr12+:104333312-104333313  | chr12+:104333286-104333403  | 3 |
| 190 | chrX+:48435466-48435467     | chrX+:48435413-48435497     | 3 |
| 191 | chr4:-:187517707-187517708  | chr4:-:187517693-187518325  | 3 |
| 192 | chr4+:1936969-1936970       | chr4+:1936870-1936989       | 3 |
| 193 | chr2:-:232326300-232326301  | chr2:-:232326250-232326728  | 3 |
| 194 | chr2:-:242438798-242438799  | chr2:-:242438671-242438829  | 3 |
| 195 | chr2:-:242438783-242438784  | chr2:-:242438671-242438829  | 3 |
| 196 | chr2:-:215645309-215645310  | chr2:-:215645283-215646233  | 3 |
| 197 | chr2+:234363485-234363486   | chr2+:234363408-234363519   | 3 |
| 198 | chr2+:233321309-233321310   | chr2+:233321289-233321405   | 3 |
| 199 | chr2+:54873330-54873331     | chr2+:54873330-54873612     | 3 |
| 200 | chr9:-:139757419-139757420  | chr9:-:139757357-139757451  | 3 |
| 201 | chr9:-:139757389-139757390  | chr9:-:139757357-139757451  | 3 |
| 202 | chr13:-:45914874-45914875   | chr13:-:45914846-45914920   | 3 |
| 203 | chr13:-:45914874-45914875   | chr13:-:45914846-45914955   | 3 |
| 204 | chr13:-:79945109-79945110   | chr13:-:79945079-79945297   | 3 |
| 205 | chr5:-:176939631-176939632  | chr5:-:176939496-176939646  | 3 |
| 206 | chr5:-:37318114-37318115    | chr5:-:37318089-37318187    | 3 |
| 207 | chr5:-:176941934-176941935  | chr5:-:176941916-176942070  | 3 |
| 208 | chr5:-:134367161-134367162  | chr5:-:134366965-134367198  | 3 |
| 209 | chr5:-:176939635-176939636  | chr5:-:176939496-176939646  | 3 |
| 210 | chr5+:14690185-14690186     | chr5+:14690147-14690417     | 3 |
| 211 | chr5+:14690265-14690266     | chr5+:14690147-14690417     | 3 |

**Supplemental Table 2.** List of several SR proteins binding site information (could be bound by SR proteins and act as ESEs, motifs are highly degenerate)

| Name               | Consensus Motif                                                                     | Reference                                                                                                 |
|--------------------|-------------------------------------------------------------------------------------|-----------------------------------------------------------------------------------------------------------|
| SRSF1<br>(SF2/ASF) |    | based on functional SELEX<br>ESEfinder 3.0<br><a href="http://rulai.cshl.edu/">http://rulai.cshl.edu/</a> |
| SRSF2<br>(SC35)    |    | based on functional SELEX<br>ESEfinder 3.0<br><a href="http://rulai.cshl.edu/">http://rulai.cshl.edu/</a> |
| SRSF5<br>(SRp40)   |    | based on functional SELEX<br>ESEfinder 3.0<br><a href="http://rulai.cshl.edu/">http://rulai.cshl.edu/</a> |
| SRSF6<br>(SRp55)   |   | based on functional SELEX<br>ESEfinder 3.0<br><a href="http://rulai.cshl.edu/">http://rulai.cshl.edu/</a> |
| SRSF3              |  | iCLIP<br>Genome Biol. 2012; 13(3): R17                                                                    |
| SRSF4              |  | iCLIP<br>Genome Biol. 2012; 13(3): R17                                                                    |
| SRSF7              |  | RNAcompete<br>Nature 2013; 499, 172–177                                                                   |
| SRSF9              |  | RNAcompete<br>Nature 2013; 499, 172–177                                                                   |
| SRSF10             |  | RNAcompete<br>Nature 2013; 499, 172–177                                                                   |



\*There are exon splicing enhancers (ESEs) and exon splicing silencers (ESSs) as well as intron splicing enhancers (ISEs) and intron splicing silencer sites (ISSs) that have no rigid space or sequence definitions (Liu et al., 2000; Cartegni et al., 2003; Black, 2003; Ke et al., 2008; Ke and Chasin, 2010). Such motifs are widely credited with providing ~50% of the information required for the choice of splice sites (Zhang et al., 2003; Chasin, 2007). While there is no obvious limitation to where these motifs that can affect splicing occur within RNAs, some are reported to lie near exon-intron boundaries (Fairbrother et al., 2002; Zhang and Chasin, 2004; Ke et al., 2011).

Black, D. L. (2003). Mechanisms of alternative pre-messenger RNA splicing. *Annu Rev Biochem* 72, 291-336.

Cartegni, L., Wang, J., Zhu, Z., Zhang, M. Q., and Krainer, A. R. (2003). ESEfinder: A web resource to identify exonic splicing enhancers. *Nucleic Acids Res* 31, 3568-3571.

Chasin, L. A. (2007). Searching for splicing motifs. *Adv Exp Med Biol* 623, 85-106.

Fairbrother, W. G., Yeh, R. F., Sharp, P. A., and Burge, C. B. (2002). Predictive identification of exonic splicing enhancers in human genes. *Science* 297, 1007-1013.

Ke, S., and Chasin, L. A. (2010). Intronic motif pairs cooperate across exons to promote pre-mRNA splicing. *Genome Biol* 11, R84.

Ke, S., Shang, S., Kalachikov, S. M., Morozova, I., Yu, L., Russo, J. J., Ju, J., and Chasin, L. A. (2011). Quantitative evaluation of all hexamers as exonic splicing elements. *Genome Res* 21, 1360-1374.

Ke, S., Zhang, X. H., and Chasin, L. A. (2008). Positive selection acting on splicing motifs reflects compensatory evolution. *Genome Res* 18, 533-543.

Liu, H. X., Chew, S. L., Cartegni, L., Zhang, M. Q., and Krainer, A. R. (2000). Exonic splicing enhancer motif recognized by human SC35 under splicing conditions. *Mol Cell Biol* 20, 1063-1071.

Zhang, X. H., and Chasin, L. A. (2004). Computational definition of sequence motifs governing constitutive exon splicing. *Genes Dev* 18, 1241-1250.

Zhang, X. H., Heller, K. A., Hefter, I., Leslie, C. S., and Chasin, L. A. (2003). Sequence information for the splicing of human pre-mRNA identified by support vector machine classification. *Genome Res* 13, 2637-2650.

**Supplemental Table 3.** List of Gene Ontologies (GOs) that are significantly enriched in short T1/2 mRNAs with multiple m6As (>=2), and most GOs are associated with regulatory functions.

|    | GO.ID      | Term                                        | Annoated | Significant | Expected | p.value  | FDR      |
|----|------------|---------------------------------------------|----------|-------------|----------|----------|----------|
| 1  | GO:0006351 | transcription, DNA-templated                | 1856     | 572         | 347.83   | 6.39E-48 | 3.53E-44 |
| 2  | GO:0006355 | regulation of transcription, DNA-templated  | 1798     | 560         | 336.96   | 2.52E-48 | 3.53E-44 |
| 3  | GO:1903506 | regulation of nucleic acid-templated tra... | 1807     | 561         | 338.65   | 6.49E-48 | 3.53E-44 |
| 4  | GO:2001141 | regulation of RNA biosynthetic process      | 1809     | 561         | 339.02   | 9.81E-48 | 4.00E-44 |
| 5  | GO:0097659 | nucleic acid-templated transcription        | 1865     | 573         | 349.52   | 1.60E-47 | 5.24E-44 |
| 6  | GO:0032774 | RNA biosynthetic process                    | 1880     | 574         | 352.33   | 1.33E-46 | 3.62E-43 |
| 7  | GO:0051252 | regulation of RNA metabolic process         | 1885     | 567         | 353.26   | 1.71E-43 | 4.00E-40 |
| 8  | GO:0019219 | regulation of nucleobase-containing comp... | 2042     | 593         | 382.69   | 1.95E-40 | 3.99E-37 |
| 9  | GO:2000112 | regulation of cellular macromolecule bio... | 2029     | 587         | 380.25   | 2.63E-39 | 4.76E-36 |
| 10 | GO:0034654 | nucleobase-containing compound biosynthe... | 2048     | 588         | 383.81   | 3.18E-38 | 5.19E-35 |
| 11 | GO:0001071 | nucleic acid binding transcription facto... | 495      | 213         | 92.72    | 3.93E-38 | 5.35E-35 |
| 12 | GO:0003700 | transcription factor activity, sequence-... | 495      | 213         | 92.72    | 3.93E-38 | 5.35E-35 |
| 13 | GO:0010556 | regulation of macromolecule biosynthetic... | 2064     | 590         | 386.81   | 1.00E-37 | 1.26E-34 |
| 14 | GO:0031326 | regulation of cellular biosynthetic proc... | 2101     | 597         | 393.74   | 2.10E-37 | 2.45E-34 |
| 15 | GO:0010468 | regulation of gene expression               | 2142     | 605         | 401.43   | 3.80E-37 | 4.14E-34 |
| 16 | GO:0009889 | regulation of biosynthetic process          | 2125     | 601         | 398.24   | 5.08E-37 | 5.18E-34 |
| 17 | GO:0019438 | aromatic compound biosynthetic process      | 2078     | 589         | 389.43   | 2.30E-36 | 2.21E-33 |
| 18 | GO:0018130 | heterocycle biosynthetic process            | 2088     | 590         | 391.31   | 5.54E-36 | 5.03E-33 |
| 19 | GO:0051171 | regulation of nitrogen compound metaboli... | 2196     | 611         | 411.55   | 2.51E-35 | 2.15E-32 |
| 20 | GO:1901362 | organic cyclic compound biosynthetic pro... | 2128     | 593         | 398.8    | 3.66E-34 | 2.99E-31 |
| 21 | GO:0060255 | regulation of macromolecule metabolic pr... | 2850     | 731         | 534.11   | 6.66E-31 | 5.18E-28 |
| 22 | GO:0016070 | RNA metabolic process                       | 2420     | 641         | 453.53   | 4.16E-30 | 3.09E-27 |
| 23 | GO:0080090 | regulation of primary metabolic process     | 2842     | 726         | 532.61   | 6.40E-30 | 4.55E-27 |
| 24 | GO:0034645 | cellular macromolecule biosynthetic proc... | 2590     | 673         | 485.39   | 2.74E-29 | 1.86E-26 |
| 25 | GO:0031323 | regulation of cellular metabolic process    | 2878     | 729         | 539.36   | 9.80E-29 | 6.40E-26 |
| 26 | GO:0019222 | regulation of metabolic process             | 3233     | 798         | 605.89   | 1.70E-28 | 1.07E-25 |
| 27 | GO:0090304 | nucleic acid metabolic process              | 2753     | 703         | 515.93   | 1.87E-28 | 1.13E-25 |
| 28 | GO:0009059 | macromolecule biosynthetic process          | 2631     | 676         | 493.07   | 8.79E-28 | 5.13E-25 |
| 29 | GO:0046872 | metal ion binding                           | 1903     | 517         | 356.45   | 1.74E-25 | 9.79E-23 |
| 30 | GO:0043169 | cation binding                              | 1923     | 517         | 360.2    | 2.78E-24 | 1.51E-21 |
| 31 | GO:0044271 | cellular nitrogen compound biosynthetic ... | 2459     | 619         | 460.84   | 6.26E-22 | 3.30E-19 |
| 32 | GO:0003677 | DNA binding                                 | 1102     | 328         | 206.42   | 6.73E-22 | 3.44E-19 |
| 33 | GO:0006139 | nucleobase-containing compound metabolic... | 2989     | 720         | 560.16   | 9.15E-21 | 4.53E-18 |
| 34 | GO:0010467 | gene expression                             | 2826     | 686         | 529.62   | 2.47E-20 | 1.19E-17 |
| 35 | GO:0044260 | cellular macromolecule metabolic process    | 4328     | 970         | 811.1    | 6.69E-20 | 3.12E-17 |
| 36 | GO:0006725 | cellular aromatic compound metabolic pro... | 3050     | 726         | 571.59   | 2.16E-19 | 9.78E-17 |
| 37 | GO:0046483 | heterocycle metabolic process               | 3054     | 723         | 572.34   | 1.51E-18 | 6.65E-16 |
| 38 | GO:0044249 | cellular biosynthetic process               | 2976     | 707         | 557.73   | 2.19E-18 | 9.40E-16 |
| 39 | GO:0003676 | nucleic acid binding                        | 2371     | 583         | 444.12   | 1.48E-17 | 6.19E-15 |
| 40 | GO:1901360 | organic cyclic compound metabolic proces... | 3126     | 732         | 585.84   | 1.86E-17 | 7.58E-15 |
| 41 | GO:0050794 | regulation of cellular process              | 4316     | 955         | 808.85   | 4.43E-17 | 1.77E-14 |
| 42 | GO:1901576 | organic substance biosynthetic process      | 3016     | 708         | 565.22   | 6.46E-17 | 2.51E-14 |
| 43 | GO:0043170 | macromolecule metabolic process             | 4526     | 991         | 848.21   | 1.39E-16 | 5.29E-14 |
| 44 | GO:0009058 | biosynthetic process                        | 3049     | 712         | 571.41   | 2.08E-16 | 7.73E-14 |
| 45 | GO:0050789 | regulation of biological process            | 4540     | 989         | 850.83   | 1.21E-15 | 4.38E-13 |
| 46 | GO:0043565 | sequence-specific DNA binding               | 446      | 147         | 83.54    | 1.12E-13 | 3.99E-11 |
| 47 | GO:0065007 | biological regulation                       | 4708     | 1007        | 882.32   | 3.27E-13 | 1.14E-10 |
| 48 | GO:0000975 | regulatory region DNA binding               | 386      | 129         | 72.3     | 1.33E-12 | 4.45E-10 |
| 49 | GO:0044212 | transcription regulatory region DNA bind... | 386      | 129         | 72.3     | 1.33E-12 | 4.45E-10 |
| 50 | GO:0001067 | regulatory region nucleic acid binding      | 387      | 129         | 72.49    | 1.65E-12 | 5.38E-10 |
| 51 | GO:0000976 | transcription regulatory region sequence... | 299      | 105         | 56.01    | 6.32E-12 | 1.98E-09 |
| 52 | GO:0006357 | regulation of transcription from RNA pol... | 917      | 251         | 171.85   | 6.29E-12 | 1.98E-09 |
| 53 | GO:0000981 | RNA polymerase II transcription factor a... | 258      | 94          | 48.33    | 7.89E-12 | 2.43E-09 |
| 54 | GO:0001227 | transcriptional repressor activity, RNA ... | 80       | 42          | 14.98    | 9.70E-12 | 2.93E-09 |
| 55 | GO:0006366 | transcription from RNA polymerase II pro... | 957      | 258         | 179.35   | 1.79E-11 | 5.32E-09 |
| 56 | GO:1990837 | sequence-specific double-stranded DNA bi... | 317      | 107         | 59.38    | 6.26E-11 | 1.82E-08 |

|     |            |                                             |      |      |        |           |           |
|-----|------------|---------------------------------------------|------|------|--------|-----------|-----------|
| 57  | GO:0034641 | cellular nitrogen compound metabolic pro... | 3394 | 748  | 636.06 | 8.74E-11  | 2.51E-08  |
| 58  | GO:0003690 | double-stranded DNA binding                 | 363  | 117  | 67.99  | 2.12E-10  | 5.96E-08  |
| 59  | GO:0000122 | negative regulation of transcription fro... | 403  | 126  | 75.53  | 3.87E-10  | 1.07E-07  |
| 60  | GO:0006807 | nitrogen compound metabolic process         | 3492 | 762  | 654.43 | 4.84E-10  | 1.32E-07  |
| 61  | GO:0000977 | RNA polymerase II regulatory region sequ... | 259  | 89   | 48.51  | 9.72E-10  | 2.60E-07  |
| 62  | GO:0045893 | positive regulation of transcription, DN... | 734  | 201  | 137.56 | 1.14E-09  | 2.95E-07  |
| 63  | GO:1903508 | positive regulation of nucleic acid-temp... | 734  | 201  | 137.56 | 1.14E-09  | 2.95E-07  |
| 64  | GO:1902680 | positive regulation of RNA biosynthetic ... | 736  | 201  | 137.93 | 1.46E-09  | 3.73E-07  |
| 65  | GO:0043167 | ion binding                                 | 2939 | 652  | 550.51 | 1.96E-09  | 4.94E-07  |
| 66  | GO:0001012 | RNA polymerase II regulatory region DNA ... | 263  | 89   | 49.26  | 2.33E-09  | 5.78E-07  |
| 67  | GO:0051254 | positive regulation of RNA metabolic pro... | 766  | 206  | 143.55 | 3.64E-09  | 8.88E-07  |
| 68  | GO:1902679 | negative regulation of RNA biosynthetic ... | 642  | 177  | 120.32 | 7.48E-09  | 1.80E-06  |
| 69  | GO:1903507 | negative regulation of nucleic acid-temp... | 635  | 174  | 119    | 1.66E-08  | 3.93E-06  |
| 70  | GO:1901363 | heterocyclic compound binding               | 3330 | 720  | 623.75 | 2.30E-08  | 5.37E-06  |
| 71  | GO:0097159 | organic cyclic compound binding             | 3352 | 724  | 627.87 | 2.46E-08  | 5.66E-06  |
| 72  | GO:0045892 | negative regulation of transcription, DN... | 625  | 171  | 117.13 | 2.52E-08  | 5.72E-06  |
| 73  | GO:0044237 | cellular metabolic process                  | 5010 | 1030 | 938.91 | 5.19E-08  | 1.16E-05  |
| 74  | GO:0001078 | transcriptional repressor activity, RNA ... | 55   | 28   | 10.3   | 6.80E-08  | 1.50E-05  |
| 75  | GO:0051253 | negative regulation of RNA metabolic pro... | 675  | 180  | 126.5  | 7.89E-08  | 1.72E-05  |
| 76  | GO:0045935 | positive regulation of nucleobase-contai... | 854  | 218  | 160.05 | 1.33E-07  | 2.85E-05  |
| 77  | GO:0000987 | core promoter proximal region sequence-s... | 167  | 59   | 31.28  | 2.29E-07  | 4.79E-05  |
| 78  | GO:0001159 | core promoter proximal region DNA bindin... | 167  | 59   | 31.28  | 2.29E-07  | 4.79E-05  |
| 79  | GO:0010558 | negative regulation of macromolecule bio... | 767  | 197  | 143.74 | 3.68E-07  | 7.61E-05  |
| 80  | GO:0010628 | positive regulation of gene expression      | 860  | 217  | 161.17 | 3.75E-07  | 7.66E-05  |
| 81  | GO:0000982 | transcription factor activity, RNA polym... | 154  | 55   | 28.85  | 3.91E-07  | 7.89E-05  |
| 82  | GO:0045934 | negative regulation of nucleobase-contai... | 745  | 192  | 139.62 | 4.09E-07  | 8.15E-05  |
| 83  | GO:2000113 | negative regulation of cellular macromol... | 742  | 191  | 139.06 | 4.82E-07  | 9.49E-05  |
| 84  | GO:0010629 | negative regulation of gene expression      | 799  | 203  | 149.74 | 5.60E-07  | 0.0001088 |
| 85  | GO:0031327 | negative regulation of cellular biosynth... | 784  | 199  | 146.93 | 7.92E-07  | 0.0001521 |
| 86  | GO:0010605 | negative regulation of macromolecule met... | 1179 | 282  | 220.95 | 9.45E-07  | 0.0001795 |
| 87  | GO:0010557 | positive regulation of macromolecule bio... | 830  | 208  | 155.55 | 1.16E-06  | 0.0002184 |
| 88  | GO:0000978 | RNA polymerase II core promoter proximal... | 159  | 55   | 29.78  | 1.26E-06  | 0.0002345 |
| 89  | GO:0044238 | primary metabolic process                   | 5002 | 1018 | 937.42 | 1.33E-06  | 0.0002444 |
| 90  | GO:0009887 | organ morphogenesis                         | 353  | 102  | 66.16  | 1.42E-06  | 0.0002584 |
| 91  | GO:0009890 | negative regulation of biosynthetic proc... | 794  | 199  | 148.8  | 2.04E-06  | 0.0003622 |
| 92  | GO:0009891 | positive regulation of biosynthetic proc... | 869  | 215  | 162.86 | 2.03E-06  | 0.0003622 |
| 93  | GO:0031328 | positive regulation of cellular biosynth... | 857  | 212  | 160.61 | 2.45E-06  | 0.0004303 |
| 94  | GO:0023057 | negative regulation of signaling            | 515  | 137  | 96.52  | 3.72E-06  | 0.0006404 |
| 95  | GO:0051172 | negative regulation of nitrogen compound... | 824  | 204  | 154.42 | 3.69E-06  | 0.0006404 |
| 96  | GO:0051173 | positive regulation of nitrogen compound... | 902  | 220  | 169.04 | 4.55E-06  | 0.0007736 |
| 97  | GO:0071704 | organic substance metabolic process         | 5135 | 1037 | 962.34 | 5.78E-06  | 0.0009727 |
| 98  | GO:0010648 | negative regulation of cell communicatio... | 525  | 138  | 98.39  | 6.80E-06  | 0.0011329 |
| 99  | GO:0009968 | negative regulation of signal transducti... | 481  | 128  | 90.14  | 7.75E-06  | 0.0012787 |
| 100 | GO:0031324 | negative regulation of cellular metaboli... | 1178 | 276  | 220.77 | 7.83E-06  | 0.0012795 |
| 101 | GO:0010604 | positive regulation of macromolecule met... | 1353 | 309  | 253.56 | 1.97E-05  | 0.0031853 |
| 102 | GO:0009966 | regulation of signal transduction           | 1090 | 255  | 204.27 | 2.12E-05  | 0.0033933 |
| 103 | GO:0004930 | G-protein coupled receptor activity         | 33   | 17   | 6.18   | 2.17E-05  | 0.0034451 |
| 104 | GO:0031325 | positive regulation of cellular metaboli... | 1361 | 310  | 255.06 | 2.40E-05  | 0.0037662 |
| 105 | GO:0009892 | negative regulation of metabolic process    | 1290 | 295  | 241.76 | 2.88E-05  | 0.0044856 |
| 106 | GO:0045944 | positive regulation of transcription fro... | 524  | 134  | 98.2   | 4.00E-05  | 0.0061706 |
| 107 | GO:0031664 | regulation of lipopolysaccharide-mediate... | 6    | 6    | 1.12   | 4.30E-05  | 0.0065619 |
| 108 | GO:0009888 | tissue development                          | 745  | 181  | 139.62 | 4.53E-05  | 0.0068508 |
| 109 | GO:0000188 | inactivation of MAPK activity               | 10   | 8    | 1.87   | 4.70E-05  | 0.0070019 |
| 110 | GO:0099600 | transmembrane receptor activity             | 117  | 40   | 21.92  | 4.71E-05  | 0.0070019 |
| 111 | GO:0060037 | pharyngeal system development               | 8    | 7    | 1.5    | 5.37E-05  | 0.0079088 |
| 112 | GO:0038023 | signaling receptor activity                 | 146  | 47   | 27.35  | 6.07E-05  | 0.0088585 |
| 113 | GO:0051216 | cartilage development                       | 62   | 25   | 11.62  | 6.16E-05  | 0.0089095 |
| 114 | GO:0004888 | transmembrane signaling receptor activit... | 111  | 38   | 20.79  | 7.00E-05  | 0.0100258 |
| 115 | GO:0006469 | negative regulation of protein kinase ac... | 120  | 40   | 22.49  | 9.05E-05  | 0.0128557 |
| 116 | GO:0001933 | negative regulation of protein phosphory... | 207  | 61   | 38.79  | 0.000102  | 0.0143674 |
| 117 | GO:0009893 | positive regulation of metabolic process    | 1662 | 365  | 311.47 | 0.0001151 | 0.0160669 |

|     |            |                                             |      |     |        |           |           |
|-----|------------|---------------------------------------------|------|-----|--------|-----------|-----------|
| 118 | GO:0003002 | regionalization                             | 134  | 43  | 25.11  | 0.0001349 | 0.0186715 |
| 119 | GO:0048705 | skeletal system morphogenesis               | 87   | 31  | 16.3   | 0.0001396 | 0.0191598 |
| 120 | GO:0007167 | enzyme linked receptor protein signaling... | 337  | 90  | 63.16  | 0.000155  | 0.0211012 |
| 121 | GO:0045595 | regulation of cell differentiation          | 642  | 156 | 120.32 | 0.0001567 | 0.0211607 |
| 122 | GO:0007166 | cell surface receptor signaling pathway     | 844  | 198 | 158.17 | 0.0001729 | 0.0231543 |
| 123 | GO:0061035 | regulation of cartilage development         | 22   | 12  | 4.12   | 0.0001797 | 0.0238729 |
| 124 | GO:0045444 | fat cell differentiation                    | 100  | 34  | 18.74  | 0.000194  | 0.0253583 |
| 125 | GO:0048585 | negative regulation of response to stimu... | 588  | 144 | 110.2  | 0.000194  | 0.0253583 |
| 126 | GO:0046332 | SMAD binding                                | 45   | 19  | 8.43   | 0.000226  | 0.0290717 |
| 127 | GO:0061448 | connective tissue development               | 89   | 31  | 16.68  | 0.0002242 | 0.0290717 |
| 128 | GO:0071499 | cellular response to laminar fluid shear... | 5    | 5   | 0.94   | 0.0002299 | 0.0293473 |
| 129 | GO:0004872 | receptor activity                           | 196  | 57  | 36.71  | 0.0002471 | 0.0308109 |
| 130 | GO:0048562 | embryonic organ morphogenesis               | 117  | 38  | 21.93  | 0.0002463 | 0.0308109 |
| 131 | GO:0060089 | molecular transducer activity               | 196  | 57  | 36.71  | 0.0002471 | 0.0308109 |
| 132 | GO:0007165 | signal transduction                         | 1895 | 408 | 355.14 | 0.0002524 | 0.0312412 |
| 133 | GO:0048608 | reproductive structure development          | 222  | 63  | 41.6   | 0.0002568 | 0.0315466 |
| 134 | GO:0006464 | cellular protein modification process       | 1901 | 409 | 356.26 | 0.0002638 | 0.0317231 |
| 135 | GO:0023051 | regulation of signaling                     | 1198 | 269 | 224.51 | 0.000266  | 0.0317231 |
| 136 | GO:0036211 | protein modification process                | 1901 | 409 | 356.26 | 0.0002638 | 0.0317231 |
| 137 | GO:1902531 | regulation of intracellular signal trans... | 682  | 163 | 127.81 | 0.000266  | 0.0317231 |
| 138 | GO:0048523 | negative regulation of cellular process     | 1933 | 415 | 362.26 | 0.0002828 | 0.0334788 |
| 139 | GO:0007389 | pattern specification process               | 168  | 50  | 31.48  | 0.000323  | 0.0379561 |
| 140 | GO:0031399 | regulation of protein modification proce... | 806  | 188 | 151.05 | 0.000353  | 0.0411858 |
| 141 | GO:0043412 | macromolecule modification                  | 2000 | 427 | 374.82 | 0.0003706 | 0.0429426 |
| 142 | GO:0006468 | protein phosphorylation                     | 823  | 191 | 154.24 | 0.0004173 | 0.0480058 |
| 143 | GO:0010646 | regulation of cell communication            | 1236 | 275 | 231.64 | 0.0004243 | 0.0484739 |
| 144 | GO:0061458 | reproductive system development             | 226  | 63  | 42.35  | 0.0004367 | 0.0495458 |
| 145 | GO:0003006 | developmental process involved in reprod... | 306  | 81  | 57.35  | 0.0004418 | 0.0497729 |

**Supplemental Table 4.** List of Gene Ontologies (GOs) that are significantly enriched in long T1/2 mRNAs with no m6A, and most GOs are associated with house keeping functions.

|    | GO.ID      | Term                                        | Annoatated | Significant | Expected | p.value  | FDR      |
|----|------------|---------------------------------------------|------------|-------------|----------|----------|----------|
| 1  | GO:0043230 | extracellular organelle                     | 1271       | 295         | 138.51   | 2.59E-44 | 2.12E-40 |
| 2  | GO:1903561 | extracellular vesicle                       | 1270       | 295         | 138.4    | 2.18E-44 | 2.12E-40 |
| 3  | GO:0065010 | extracellular membrane-bounded organelle    | 1269       | 294         | 138.29   | 5.85E-44 | 2.39E-40 |
| 4  | GO:0070062 | extracellular exosome                       | 1268       | 294         | 138.18   | 4.92E-44 | 2.39E-40 |
| 5  | GO:0031982 | vesicle                                     | 1614       | 334         | 175.88   | 2.03E-39 | 5.53E-36 |
| 6  | GO:0031988 | membrane-bounded vesicle                    | 1556       | 326         | 169.56   | 1.89E-39 | 5.53E-36 |
| 7  | GO:0044421 | extracellular region part                   | 1469       | 312         | 160.08   | 1.20E-38 | 2.79E-35 |
| 8  | GO:0005576 | extracellular region                        | 1545       | 318         | 168.36   | 1.46E-36 | 2.98E-33 |
| 9  | GO:0044445 | cytosolic part                              | 128        | 69          | 13.95    | 1.08E-33 | 1.97E-30 |
| 10 | GO:0022626 | cytosolic ribosome                          | 74         | 51          | 8.06     | 1.54E-32 | 2.52E-29 |
| 11 | GO:0044444 | cytoplasmic part                            | 3621       | 539         | 394.59   | 7.36E-25 | 1.09E-21 |
| 12 | GO:0044391 | ribosomal subunit                           | 128        | 59          | 13.95    | 2.88E-24 | 3.93E-21 |
| 13 | GO:1901564 | organonitrogen compound metabolic proces... | 966        | 204         | 104.13   | 4.80E-24 | 6.04E-21 |
| 14 | GO:0098798 | mitochondrial protein complex               | 97         | 50          | 10.57    | 1.68E-23 | 1.96E-20 |
| 15 | GO:0032991 | macromolecular complex                      | 2703       | 429         | 294.56   | 3.49E-23 | 3.80E-20 |
| 16 | GO:0005743 | mitochondrial inner membrane                | 238        | 82          | 25.94    | 5.86E-23 | 5.98E-20 |
| 17 | GO:0005737 | cytoplasm                                   | 5171       | 693         | 563.5    | 7.37E-23 | 7.08E-20 |
| 18 | GO:0022625 | cytosolic large ribosomal subunit           | 44         | 32          | 4.79     | 5.48E-22 | 4.81E-19 |
| 19 | GO:0098800 | inner mitochondrial membrane protein com... | 71         | 41          | 7.74     | 5.60E-22 | 4.81E-19 |
| 20 | GO:0003735 | structural constituent of ribosome          | 148        | 60          | 15.87    | 1.78E-21 | 1.45E-18 |
| 21 | GO:0005740 | mitochondrial envelope                      | 356        | 102         | 38.79    | 2.30E-21 | 1.79E-18 |
| 22 | GO:0019866 | organelle inner membrane                    | 268        | 85          | 29.2     | 4.76E-21 | 3.54E-18 |
| 23 | GO:0031966 | mitochondrial membrane                      | 329        | 96          | 35.85    | 9.29E-21 | 6.60E-18 |
| 24 | GO:0005840 | ribosome                                    | 174        | 65          | 18.96    | 1.60E-20 | 1.09E-17 |
| 25 | GO:0044455 | mitochondrial membrane part                 | 107        | 49          | 11.66    | 3.47E-20 | 2.27E-17 |
| 26 | GO:0070469 | respiratory chain                           | 51         | 33          | 5.56     | 4.00E-20 | 2.51E-17 |
| 27 | GO:0005829 | cytosol                                     | 1016       | 200         | 110.72   | 4.61E-19 | 2.79E-16 |
| 28 | GO:0005198 | structural molecule activity                | 265        | 79          | 28.42    | 3.17E-18 | 1.85E-15 |
| 29 | GO:0005746 | mitochondrial respiratory chain             | 45         | 29          | 4.9      | 9.24E-18 | 5.20E-15 |
| 30 | GO:0098803 | respiratory chain complex                   | 43         | 28          | 4.69     | 2.28E-17 | 1.20E-14 |
| 31 | GO:1901566 | organonitrogen compound biosynthetic pro... | 691        | 147         | 74.48    | 2.26E-17 | 1.20E-14 |
| 32 | GO:0005739 | mitochondrion                               | 1029       | 196         | 112.13   | 5.26E-17 | 2.68E-14 |
| 33 | GO:0044429 | mitochondrial part                          | 522        | 121         | 56.88    | 6.14E-17 | 3.04E-14 |
| 34 | GO:0030529 | intracellular ribonucleoprotein complex     | 546        | 124         | 59.5     | 1.33E-16 | 6.22E-14 |
| 35 | GO:1990904 | ribonucleoprotein complex                   | 546        | 124         | 59.5     | 1.33E-16 | 6.22E-14 |
| 36 | GO:0043209 | myelin sheath                               | 109        | 45          | 11.88    | 1.70E-16 | 7.73E-14 |
| 37 | GO:0015934 | large ribosomal subunit                     | 79         | 37          | 8.61     | 6.11E-16 | 2.70E-13 |
| 38 | GO:0005747 | mitochondrial respiratory chain complex ... | 33         | 23          | 3.6      | 1.77E-15 | 7.22E-13 |
| 39 | GO:0030964 | NADH dehydrogenase complex                  | 33         | 23          | 3.6      | 1.77E-15 | 7.22E-13 |
| 40 | GO:0045271 | respiratory chain complex I                 | 33         | 23          | 3.6      | 1.77E-15 | 7.22E-13 |
| 41 | GO:0006518 | peptide metabolic process                   | 479        | 109         | 51.63    | 4.68E-15 | 1.86E-12 |
| 42 | GO:1902600 | hydrogen ion transmembrane transport        | 47         | 27          | 5.07     | 6.13E-15 | 2.38E-12 |
| 43 | GO:0098796 | membrane protein complex                    | 409        | 98          | 44.57    | 8.39E-15 | 3.19E-12 |
| 44 | GO:0043043 | peptide biosynthetic process                | 435        | 100         | 46.89    | 3.62E-14 | 1.35E-11 |
| 45 | GO:0031967 | organelle envelope                          | 589        | 124         | 64.19    | 5.90E-14 | 2.10E-11 |
| 46 | GO:0043603 | cellular amide metabolic process            | 542        | 116         | 58.42    | 5.89E-14 | 2.10E-11 |
| 47 | GO:0031975 | envelope                                    | 590        | 124         | 64.29    | 6.73E-14 | 2.34E-11 |
| 48 | GO:0006412 | translation                                 | 427        | 98          | 46.03    | 7.50E-14 | 2.55E-11 |
| 49 | GO:0015078 | hydrogen ion transmembrane transporter a... | 44         | 25          | 4.72     | 8.02E-14 | 2.67E-11 |
| 50 | GO:0016469 | proton-transporting two-sector ATPase co... | 29         | 20          | 3.16     | 1.76E-13 | 5.75E-11 |
| 51 | GO:1990204 | oxidoreductase complex                      | 63         | 30          | 6.87     | 2.08E-13 | 6.66E-11 |
| 52 | GO:0022627 | cytosolic small ribosomal subunit           | 24         | 18          | 2.62     | 2.86E-13 | 8.97E-11 |
| 53 | GO:0043234 | protein complex                             | 2206       | 333         | 240.4    | 4.34E-13 | 1.34E-10 |
| 54 | GO:0043604 | amide biosynthetic process                  | 464        | 101         | 50.01    | 1.03E-12 | 3.11E-10 |
| 55 | GO:0006818 | hydrogen transport                          | 59         | 28          | 6.36     | 1.13E-12 | 3.29E-10 |
| 56 | GO:0015992 | proton transport                            | 59         | 28          | 6.36     | 1.13E-12 | 3.29E-10 |
| 57 | GO:0009141 | nucleoside triphosphate metabolic proces... | 118        | 40          | 12.72    | 1.12E-11 | 3.22E-09 |
| 58 | GO:0045259 | proton-transporting ATP synthase complex    | 15         | 13          | 1.63     | 2.40E-11 | 6.77E-09 |
| 59 | GO:0015985 | energy coupled proton transport, down el... | 13         | 12          | 1.4      | 2.70E-11 | 7.34E-09 |
| 60 | GO:0015986 | ATP synthesis coupled proton transport      | 13         | 12          | 1.4      | 2.70E-11 | 7.34E-09 |
| 61 | GO:0043226 | organelle                                   | 6377       | 769         | 694.92   | 3.01E-11 | 8.05E-09 |
| 62 | GO:0006754 | ATP biosynthetic process                    | 23         | 16          | 2.48     | 3.45E-11 | 9.10E-09 |
| 63 | GO:0055114 | oxidation-reduction process                 | 434        | 92          | 46.78    | 5.49E-11 | 1.42E-08 |
| 64 | GO:0055086 | nucleobase-containing small molecule met... | 270        | 66          | 29.1     | 6.56E-11 | 1.67E-08 |
| 65 | GO:0009142 | nucleoside triphosphate biosynthetic pro... | 40         | 21          | 4.31     | 6.83E-11 | 1.72E-08 |
| 66 | GO:0009145 | purine nucleoside triphosphate biosynthe... | 30         | 18          | 3.23     | 8.05E-11 | 1.96E-08 |
| 67 | GO:0009206 | purine ribonucleoside triphosphate biosy... | 30         | 18          | 3.23     | 8.05E-11 | 1.96E-08 |

|     |            |                                             |      |     |        |          |           |
|-----|------------|---------------------------------------------|------|-----|--------|----------|-----------|
| 68  | GO:0009205 | purine ribonucleoside triphosphate metab... | 101  | 35  | 10.89  | 1.10E-10 | 2.65E-08  |
| 69  | GO:0009144 | purine nucleoside triphosphate metabolic... | 106  | 36  | 11.43  | 1.15E-10 | 2.68E-08  |
| 70  | GO:0009199 | ribonucleoside triphosphate metabolic pr... | 106  | 36  | 11.43  | 1.15E-10 | 2.68E-08  |
| 71  | GO:0042278 | purine nucleoside metabolic process         | 147  | 44  | 15.85  | 1.16E-10 | 2.68E-08  |
| 72  | GO:0009201 | ribonucleoside triphosphate biosynthetic... | 34   | 19  | 3.66   | 1.33E-10 | 3.01E-08  |
| 73  | GO:0003723 | RNA binding                                 | 1177 | 192 | 126.24 | 1.47E-10 | 3.28E-08  |
| 74  | GO:0006753 | nucleoside phosphate metabolic process      | 239  | 60  | 25.76  | 1.60E-10 | 3.43E-08  |
| 75  | GO:0009126 | purine nucleoside monophosphate metaboli... | 112  | 37  | 12.07  | 1.58E-10 | 3.43E-08  |
| 76  | GO:0009167 | purine ribonucleoside monophosphate meta... | 112  | 37  | 12.07  | 1.58E-10 | 3.43E-08  |
| 77  | GO:0033177 | proton-transporting two-sector ATPase co... | 14   | 12  | 1.53   | 1.94E-10 | 4.11E-08  |
| 78  | GO:0046128 | purine ribonucleoside metabolic process     | 145  | 43  | 15.63  | 2.64E-10 | 5.54E-08  |
| 79  | GO:0046034 | ATP metabolic process                       | 91   | 32  | 9.81   | 4.55E-10 | 9.42E-08  |
| 80  | GO:0009117 | nucleotide metabolic process                | 235  | 58  | 25.33  | 6.64E-10 | 1.36E-07  |
| 81  | GO:0072521 | purine-containing compound metabolic pro... | 194  | 51  | 20.91  | 6.96E-10 | 1.40E-07  |
| 82  | GO:0009123 | nucleoside monophosphate metabolic proce... | 129  | 39  | 13.9   | 9.75E-10 | 1.94E-07  |
| 83  | GO:0003954 | NADH dehydrogenase activity                 | 18   | 13  | 1.93   | 1.17E-09 | 2.31E-07  |
| 84  | GO:0009161 | ribonucleoside monophosphate metabolic p... | 120  | 37  | 12.93  | 1.43E-09 | 2.78E-07  |
| 85  | GO:0005753 | mitochondrial proton-transporting ATP sy... | 13   | 11  | 1.42   | 1.54E-09 | 2.97E-07  |
| 86  | GO:0043227 | membrane-bounded organelle                  | 6039 | 730 | 658.09 | 1.60E-09 | 3.04E-07  |
| 87  | GO:0044281 | small molecule metabolic process            | 791  | 138 | 85.26  | 1.68E-09 | 3.42E-07  |
| 88  | GO:0009127 | purine nucleoside monophosphate biosynth... | 42   | 20  | 4.53   | 1.85E-09 | 3.39E-07  |
| 89  | GO:0009168 | purine ribonucleoside monophosphate bios... | 42   | 20  | 4.53   | 1.85E-09 | 3.39E-07  |
| 90  | GO:0045263 | proton-transporting ATP synthase complex... | 9    | 9   | 0.98   | 2.09E-09 | 3.79E-07  |
| 91  | GO:0006163 | purine nucleotide metabolic process         | 171  | 46  | 18.43  | 2.18E-09 | 3.91E-07  |
| 92  | GO:0015935 | small ribosomal subunit                     | 50   | 22  | 5.45   | 2.31E-09 | 4.05E-07  |
| 93  | GO:0044424 | intracellular part                          | 6703 | 792 | 730.45 | 2.31E-09 | 4.05E-07  |
| 94  | GO:0030055 | cell-substrate junction                     | 228  | 56  | 24.85  | 2.42E-09 | 4.20E-07  |
| 95  | GO:0009119 | ribonucleoside metabolic process            | 161  | 44  | 17.35  | 2.87E-09 | 4.93E-07  |
| 96  | GO:0009116 | nucleoside metabolic process                | 168  | 45  | 18.11  | 3.78E-09 | 6.44E-07  |
| 97  | GO:0005924 | cell-substrate adherens junction            | 225  | 55  | 24.52  | 4.06E-09 | 6.76E-07  |
| 98  | GO:0005925 | focal adhesion                              | 225  | 55  | 24.52  | 4.06E-09 | 6.76E-07  |
| 99  | GO:0009150 | purine ribonucleotide metabolic process     | 164  | 44  | 17.68  | 5.35E-09 | 8.83E-07  |
| 100 | GO:1901657 | glycosyl compound metabolic process         | 176  | 46  | 18.97  | 5.93E-09 | 9.69E-07  |
| 101 | GO:0005912 | adherens junction                           | 259  | 60  | 28.22  | 7.12E-09 | 1.15E-06  |
| 102 | GO:0008137 | NADH dehydrogenase (ubiquinone) activity    | 17   | 12  | 1.82   | 8.03E-09 | 1.27E-06  |
| 103 | GO:0050136 | NADH dehydrogenase (quinone) activity       | 17   | 12  | 1.82   | 8.03E-09 | 1.27E-06  |
| 104 | GO:0044422 | organelle part                              | 4326 | 551 | 471.42 | 8.65E-09 | 1.36E-06  |
| 105 | GO:0009259 | ribonucleotide metabolic process            | 173  | 45  | 18.65  | 1.02E-08 | 1.59E-06  |
| 106 | GO:0070161 | anchoring junction                          | 265  | 60  | 28.88  | 1.77E-08 | 2.73E-06  |
| 107 | GO:0042451 | purine nucleoside biosynthetic process      | 56   | 22  | 6.04   | 2.40E-08 | 3.62E-06  |
| 108 | GO:0046129 | purine ribonucleoside biosynthetic proce... | 56   | 22  | 6.04   | 2.40E-08 | 3.62E-06  |
| 109 | GO:0016491 | oxidoreductase activity                     | 312  | 66  | 33.46  | 3.10E-08 | 4.65E-06  |
| 110 | GO:0019693 | ribose phosphate metabolic process          | 179  | 45  | 19.29  | 3.15E-08 | 4.68E-06  |
| 111 | GO:0044446 | intracellular organelle part                | 4272 | 542 | 465.54 | 3.22E-08 | 4.73E-06  |
| 112 | GO:0009124 | nucleoside monophosphate biosynthetic pr... | 57   | 22  | 6.14   | 3.51E-08 | 5.12E-06  |
| 113 | GO:0009165 | nucleotide biosynthetic process             | 113  | 33  | 12.18  | 4.91E-08 | 7.03E-06  |
| 114 | GO:1901293 | nucleoside phosphate biosynthetic proces... | 113  | 33  | 12.18  | 4.91E-08 | 7.03E-06  |
| 115 | GO:0000502 | proteasome complex                          | 62   | 23  | 6.76   | 5.07E-08 | 7.20E-06  |
| 116 | GO:0009156 | ribonucleoside monophosphate biosyntheti... | 50   | 20  | 5.39   | 7.29E-08 | 1.03E-05  |
| 117 | GO:0016020 | membrane                                    | 3513 | 456 | 382.82 | 1.13E-07 | 1.57E-05  |
| 118 | GO:0006164 | purine nucleotide biosynthetic process      | 76   | 25  | 8.19   | 1.66E-07 | 2.29E-05  |
| 119 | GO:0045333 | cellular respiration                        | 76   | 25  | 8.19   | 1.66E-07 | 2.29E-05  |
| 120 | GO:0031090 | organelle membrane                          | 1447 | 215 | 157.68 | 1.69E-07 | 2.30E-05  |
| 121 | GO:0044822 | poly(A) RNA binding                         | 923  | 147 | 99     | 1.73E-07 | 2.34E-05  |
| 122 | GO:0000276 | mitochondrial proton-transporting ATP sy... | 7    | 7   | 0.76   | 1.79E-07 | 2.39E-05  |
| 123 | GO:0019752 | carboxylic acid metabolic process           | 381  | 74  | 41.07  | 2.22E-07 | 2.95E-05  |
| 124 | GO:0015077 | monovalent inorganic cation transmembran... | 88   | 27  | 9.44   | 2.44E-07 | 3.22E-05  |
| 125 | GO:0006091 | generation of precursor metabolites and ... | 149  | 38  | 16.06  | 2.52E-07 | 3.28E-05  |
| 126 | GO:0016655 | oxidoreductase activity, acting on NAD(P... | 21   | 12  | 2.25   | 2.53E-07 | 3.28E-05  |
| 127 | GO:0009152 | purine ribonucleotide biosynthetic proce... | 73   | 24  | 7.87   | 2.97E-07 | 3.82E-05  |
| 128 | GO:0036442 | hydrogen-exporting ATPase activity          | 15   | 10  | 1.61   | 3.48E-07 | 4.45E-05  |
| 129 | GO:0009163 | nucleoside biosynthetic process             | 69   | 23  | 7.44   | 3.96E-07 | 4.98E-05  |
| 130 | GO:0042455 | ribonucleoside biosynthetic process         | 69   | 23  | 7.44   | 3.96E-07 | 4.98E-05  |
| 131 | GO:1901659 | glycosyl compound biosynthetic process      | 70   | 23  | 7.55   | 5.31E-07 | 6.62E-05  |
| 132 | GO:0009260 | ribonucleotide biosynthetic process         | 81   | 25  | 8.73   | 6.57E-07 | 8.14E-05  |
| 133 | GO:0015988 | energy coupled proton transmembrane tran... | 16   | 10  | 1.72   | 8.79E-07 | 0.0001072 |
| 134 | GO:0015991 | ATP hydrolysis coupled proton transport     | 16   | 10  | 1.72   | 8.79E-07 | 0.0001072 |
| 135 | GO:0046390 | ribose phosphate biosynthetic process       | 83   | 25  | 8.95   | 1.10E-06 | 0.0001315 |
| 136 | GO:0072522 | purine-containing compound biosynthetic ... | 83   | 25  | 8.95   | 1.10E-06 | 0.0001315 |
| 137 | GO:0022900 | electron transport chain                    | 35   | 15  | 3.77   | 1.11E-06 | 0.0001327 |
| 138 | GO:0015980 | energy derivation by oxidation of organi... | 112  | 30  | 12.07  | 1.53E-06 | 0.0001815 |

|     |            |                                             |      |     |        |           |           |
|-----|------------|---------------------------------------------|------|-----|--------|-----------|-----------|
| 139 | GO:0043436 | oxoacid metabolic process                   | 407  | 75  | 43.87  | 1.57E-06  | 0.0001842 |
| 140 | GO:0019637 | organophosphate metabolic process           | 429  | 78  | 46.24  | 1.65E-06  | 0.0001929 |
| 141 | GO:0019829 | cation-transporting ATPase activity         | 28   | 13  | 3      | 1.83E-06  | 0.0002124 |
| 142 | GO:0044769 | ATPase activity, coupled to transmembran... | 14   | 9   | 1.5    | 2.20E-06  | 0.0002527 |
| 143 | GO:0006082 | organic acid metabolic process              | 411  | 75  | 44.3   | 2.30E-06  | 0.0002626 |
| 144 | GO:0042625 | ATPase coupled ion transmembrane transpo... | 29   | 13  | 3.11   | 3.00E-06  | 0.0003402 |
| 145 | GO:0051287 | NAD binding                                 | 30   | 13  | 3.22   | 4.78E-06  | 0.000538  |
| 146 | GO:0007338 | single fertilization                        | 30   | 13  | 3.23   | 5.04E-06  | 0.0005613 |
| 147 | GO:0016614 | oxidoreductase activity, acting on CH-OH... | 58   | 19  | 6.22   | 5.05E-06  | 0.0005613 |
| 148 | GO:0016616 | oxidoreductase activity, acting on the C... | 49   | 17  | 5.26   | 6.60E-06  | 0.0007284 |
| 149 | GO:0090662 | ATP hydrolysis coupled transmembrane tra... | 19   | 10  | 2.05   | 7.48E-06  | 0.0008204 |
| 150 | GO:0022904 | respiratory electron transport chain        | 31   | 13  | 3.34   | 7.83E-06  | 0.0008533 |
| 151 | GO:0005622 | intracellular                               | 6951 | 800 | 757.48 | 8.77E-06  | 0.0009491 |
| 152 | GO:0044712 | single-organism catabolic process           | 412  | 73  | 44.41  | 9.41E-06  | 0.0010113 |
| 153 | GO:0016651 | oxidoreductase activity, acting on NAD(P... | 41   | 15  | 4.4    | 1.10E-05  | 0.0011729 |
| 154 | GO:0098662 | inorganic cation transmembrane transport    | 179  | 39  | 19.29  | 1.17E-05  | 0.0012406 |
| 155 | GO:0098660 | inorganic ion transmembrane transport       | 199  | 42  | 21.45  | 1.25E-05  | 0.0013172 |
| 156 | GO:0044765 | single-organism transport                   | 1486 | 207 | 160.18 | 1.54E-05  | 0.0016125 |
| 157 | GO:0006457 | protein folding                             | 108  | 27  | 11.64  | 2.02E-05  | 0.0021063 |
| 158 | GO:0043229 | intracellular organelle                     | 6073 | 712 | 661.8  | 2.10E-05  | 0.0021719 |
| 159 | GO:0034622 | cellular macromolecular complex assembly    | 468  | 79  | 50.45  | 2.50E-05  | 0.0025687 |
| 160 | GO:0015672 | monovalent inorganic cation transport       | 159  | 35  | 17.14  | 2.59E-05  | 0.0026191 |
| 161 | GO:0022624 | proteasome accessory complex                | 21   | 10  | 2.29   | 2.57E-05  | 0.0026191 |
| 162 | GO:0034220 | ion transmembrane transport                 | 280  | 53  | 30.18  | 2.60E-05  | 0.0026191 |
| 163 | GO:0009055 | electron carrier activity                   | 39   | 14  | 4.18   | 2.77E-05  | 0.0027768 |
| 164 | GO:0045184 | establishment of protein localization       | 997  | 146 | 107.47 | 3.23E-05  | 0.0032167 |
| 165 | GO:0008540 | proteasome regulatory particle, base sub... | 11   | 7   | 1.2    | 3.97E-05  | 0.0039259 |
| 166 | GO:0022892 | substrate-specific transporter activity     | 343  | 61  | 36.79  | 4.03E-05  | 0.0039642 |
| 167 | GO:0065003 | macromolecular complex assembly             | 794  | 120 | 85.59  | 4.50E-05  | 0.0044066 |
| 168 | GO:0005215 | transporter activity                        | 405  | 69  | 43.44  | 5.30E-05  | 0.005152  |
| 169 | GO:0015031 | protein transport                           | 926  | 136 | 99.81  | 5.48E-05  | 0.005301  |
| 170 | GO:0001731 | formation of translation preinitiation c... | 15   | 8   | 1.62   | 5.68E-05  | 0.0053957 |
| 171 | GO:0022890 | inorganic cation transmembrane transport... | 146  | 32  | 15.66  | 5.67E-05  | 0.0053957 |
| 172 | GO:0044710 | single-organism metabolic process           | 2293 | 297 | 247.16 | 5.68E-05  | 0.0053957 |
| 173 | GO:0098655 | cation transmembrane transport              | 198  | 40  | 21.34  | 5.74E-05  | 0.0054245 |
| 174 | GO:1901575 | organic substance catabolic process         | 864  | 128 | 93.13  | 6.29E-05  | 0.0059036 |
| 175 | GO:0022891 | substrate-specific transmembrane transpo... | 262  | 49  | 28.1   | 6.36E-05  | 0.0059381 |
| 176 | GO:0015075 | ion transmembrane transporter activity      | 235  | 45  | 25.21  | 7.04E-05  | 0.0065359 |
| 177 | GO:0009566 | fertilization                               | 47   | 15  | 5.07   | 7.42E-05  | 0.0068483 |
| 178 | GO:0008553 | hydrogen-exporting ATPase activity, phos... | 6    | 5   | 0.64   | 7.68E-05  | 0.0070113 |
| 179 | GO:1902578 | single-organism localization                | 1608 | 217 | 173.33 | 7.67E-05  | 0.0070113 |
| 180 | GO:0046961 | proton-transporting ATPase activity, rot... | 12   | 7   | 1.29   | 7.78E-05  | 0.0070589 |
| 181 | GO:0007339 | binding of sperm to zona pellucida          | 12   | 7   | 1.29   | 8.03E-05  | 0.0072073 |
| 182 | GO:0035036 | sperm-egg recognition                       | 12   | 7   | 1.29   | 8.03E-05  | 0.0072073 |
| 183 | GO:0002199 | zona pellucida receptor complex             | 6    | 5   | 0.65   | 8.30E-05  | 0.0073328 |
| 184 | GO:0005832 | chaperonin-containing T-complex             | 6    | 5   | 0.65   | 8.30E-05  | 0.0073328 |
| 185 | GO:0016272 | prefoldin complex                           | 6    | 5   | 0.65   | 8.30E-05  | 0.0073328 |
| 186 | GO:0055085 | transmembrane transport                     | 402  | 68  | 43.33  | 8.73E-05  | 0.0076644 |
| 187 | GO:0006812 | cation transport                            | 307  | 55  | 33.09  | 8.92E-05  | 0.0077955 |
| 188 | GO:0006810 | transport                                   | 1838 | 243 | 198.12 | 0.0001001 | 0.0086991 |
| 189 | GO:0009988 | cell-cell recognition                       | 16   | 8   | 1.72   | 0.0001029 | 0.0088957 |
| 190 | GO:0042773 | ATP synthesis coupled electron transport    | 20   | 9   | 2.16   | 0.0001053 | 0.0090507 |
| 191 | GO:0046907 | intracellular transport                     | 923  | 134 | 99.49  | 0.0001087 | 0.0092984 |
| 192 | GO:0009056 | catabolic process                           | 1014 | 145 | 109.3  | 0.0001149 | 0.0097721 |
| 193 | GO:0051021 | GDP-dissociation inhibitor binding          | 4    | 4   | 0.43   | 0.0001316 | 0.011078  |
| 194 | GO:0051022 | Rho GDP-dissociation inhibitor binding      | 4    | 4   | 0.43   | 0.0001316 | 0.011078  |
| 195 | GO:0051234 | establishment of localization               | 1930 | 252 | 208.04 | 0.0001674 | 0.0140215 |
| 196 | GO:0033176 | proton-transporting V-type ATPase comple... | 13   | 7   | 1.42   | 0.0001693 | 0.0141069 |
| 197 | GO:0051536 | iron-sulfur cluster binding                 | 46   | 14  | 4.93   | 0.000215  | 0.0177424 |
| 198 | GO:0051540 | metal cluster binding                       | 46   | 14  | 4.93   | 0.000215  | 0.0177424 |
| 199 | GO:0005623 | cell                                        | 7227 | 819 | 787.55 | 0.0002309 | 0.0189543 |
| 200 | GO:0031597 | cytosolic proteasome complex                | 10   | 6   | 1.09   | 0.0002349 | 0.0191881 |
| 201 | GO:0044085 | cellular component biogenesis               | 1305 | 178 | 140.67 | 0.0002364 | 0.0192117 |
| 202 | GO:0005615 | extracellular space                         | 279  | 50  | 30.4   | 0.0002402 | 0.0194275 |
| 203 | GO:0042273 | ribosomal large subunit biogenesis          | 36   | 12  | 3.88   | 0.0002448 | 0.0197007 |
| 204 | GO:0007005 | mitochondrion organization                  | 356  | 60  | 38.37  | 0.0002511 | 0.0201038 |
| 205 | GO:1902582 | single-organism intracellular transport     | 818  | 119 | 88.17  | 0.0002547 | 0.020296  |
| 206 | GO:0016471 | vacuolar proton-transporting V-type ATPa... | 7    | 5   | 0.76   | 0.0002645 | 0.0209715 |
| 207 | GO:0006811 | ion transport                               | 448  | 72  | 48.29  | 0.0002771 | 0.02176   |
| 208 | GO:0051082 | unfolded protein binding                    | 47   | 14  | 5.04   | 0.0002765 | 0.02176   |
| 209 | GO:0022618 | ribonucleoprotein complex assembly          | 138  | 29  | 14.88  | 0.0002922 | 0.0228402 |

|     |            |                                             |      |     |        |           |           |
|-----|------------|---------------------------------------------|------|-----|--------|-----------|-----------|
| 210 | GO:0003743 | translation initiation factor activity      | 42   | 13  | 4.5    | 0.0002987 | 0.0230153 |
| 211 | GO:0044464 | cell part                                   | 7212 | 817 | 785.92 | 0.0002979 | 0.0230153 |
| 212 | GO:0090407 | organophosphate biosynthetic process        | 220  | 41  | 23.71  | 0.0002969 | 0.0230153 |
| 213 | GO:0005839 | proteasome core complex                     | 14   | 7   | 1.53   | 0.0003068 | 0.0234178 |
| 214 | GO:0006886 | intracellular protein transport             | 558  | 86  | 60.15  | 0.000306  | 0.0234178 |
| 215 | GO:0033036 | macromolecule localization                  | 1363 | 184 | 146.92 | 0.0003165 | 0.0240506 |
| 216 | GO:0008324 | cation transmembrane transporter activit... | 173  | 34  | 18.56  | 0.0003194 | 0.0241551 |
| 217 | GO:0006119 | oxidative phosphorylation                   | 32   | 11  | 3.45   | 0.0003267 | 0.0245951 |
| 218 | GO:0048471 | perinuclear region of cytoplasm             | 327  | 56  | 35.63  | 0.0003505 | 0.026263  |
| 219 | GO:0055080 | cation homeostasis                          | 180  | 35  | 19.4   | 0.0003553 | 0.0265033 |
| 220 | GO:0007006 | mitochondrial membrane organization         | 59   | 16  | 6.36   | 0.0003628 | 0.0269416 |
| 221 | GO:0051649 | establishment of localization in cell       | 1140 | 157 | 122.88 | 0.0003797 | 0.0280697 |
| 222 | GO:0016787 | hydrolase activity                          | 1171 | 160 | 125.6  | 0.000388  | 0.0285511 |
| 223 | GO:0008104 | protein localization                        | 1225 | 167 | 132.04 | 0.0003967 | 0.0290594 |
| 224 | GO:0006839 | mitochondrial transport                     | 134  | 28  | 14.44  | 0.0004073 | 0.0297033 |
| 225 | GO:0009060 | aerobic respiration                         | 33   | 11  | 3.56   | 0.000443  | 0.0320183 |
| 226 | GO:0098771 | inorganic ion homeostasis                   | 182  | 35  | 19.62  | 0.0004412 | 0.0320183 |
| 227 | GO:0000027 | ribosomal large subunit assembly            | 19   | 8   | 2.05   | 0.0004496 | 0.0323554 |
| 228 | GO:0022857 | transmembrane transporter activity          | 291  | 50  | 31.21  | 0.0004617 | 0.0330808 |
| 229 | GO:0004298 | threonine-type endopeptidase activity       | 15   | 7   | 1.61   | 0.0004726 | 0.033569  |
| 230 | GO:0070003 | threonine-type peptidase activity           | 15   | 7   | 1.61   | 0.0004726 | 0.033569  |
| 231 | GO:0022607 | cellular component assembly                 | 1146 | 157 | 123.53 | 0.0004875 | 0.0344767 |
| 232 | GO:0090150 | establishment of protein localization to... | 136  | 28  | 14.66  | 0.0005241 | 0.0369015 |
| 233 | GO:0051289 | protein homotetramerization                 | 34   | 11  | 3.66   | 0.0005919 | 0.0415003 |
| 234 | GO:0036402 | proteasome-activating ATPase activity       | 5    | 4   | 0.54   | 0.0006016 | 0.0418185 |
| 235 | GO:0046933 | proton-transporting ATP synthase activit... | 5    | 4   | 0.54   | 0.0006016 | 0.0418185 |
| 236 | GO:0007008 | outer mitochondrial membrane organizatio... | 8    | 5   | 0.86   | 0.0006096 | 0.0421971 |
| 237 | GO:0061615 | glycolytic process through fructose-6-ph... | 5    | 4   | 0.54   | 0.0006133 | 0.042271  |
| 238 | GO:0005766 | primary lysosome                            | 8    | 5   | 0.87   | 0.0006418 | 0.0438709 |
| 239 | GO:0042582 | azurophil granule                           | 8    | 5   | 0.87   | 0.0006418 | 0.0438709 |
| 240 | GO:0006520 | cellular amino acid metabolic process       | 165  | 32  | 17.79  | 0.0006564 | 0.04468   |
| 241 | GO:0015399 | primary active transmembrane transporter... | 51   | 14  | 5.47   | 0.0006957 | 0.04696   |
| 242 | GO:0015405 | P-P-bond-hydrolysis-driven transmembrane... | 51   | 14  | 5.47   | 0.0006957 | 0.04696   |



**Supplemental Table 5.** List of Gene Ontologies (GOs) that are significantly enriched in short T1/2 mRNAs with no m6A, and most GOs are associated with nucleosome related functions.

|    | GO.ID      | Term                                        | Annotated | Significant | Expected | p.value  | FDR       |
|----|------------|---------------------------------------------|-----------|-------------|----------|----------|-----------|
| 1  | GO:0000786 | nucleosome                                  | 38        | 16          | 1.27     | 1.75E-14 | 2.87E-10  |
| 2  | GO:0044815 | DNA packaging complex                       | 43        | 16          | 1.43     | 1.80E-13 | 1.47E-09  |
| 3  | GO:0000788 | nuclear nucleosome                          | 13        | 8           | 0.43     | 1.54E-09 | 8.41E-06  |
| 4  | GO:0006334 | nucleosome assembly                         | 54        | 13          | 1.82     | 1.74E-08 | 7.12E-05  |
| 5  | GO:0032993 | protein-DNA complex                         | 92        | 16          | 3.07     | 4.91E-08 | 0.0001603 |
| 6  | GO:0005179 | hormone activity                            | 9         | 6           | 0.3      | 9.85E-08 | 0.0002681 |
| 7  | GO:0031497 | chromatin assembly                          | 66        | 13          | 2.22     | 2.24E-07 | 0.0005223 |
| 8  | GO:0006323 | DNA packaging                               | 93        | 15          | 3.13     | 4.10E-07 | 0.0008376 |
| 9  | GO:0034728 | nucleosome organization                     | 71        | 13          | 2.39     | 5.47E-07 | 0.0009925 |
| 10 | GO:0006333 | chromatin assembly or disassembly           | 81        | 13          | 2.73     | 2.61E-06 | 0.0042676 |
| 11 | GO:0019731 | antibacterial humoral response              | 9         | 5           | 0.3      | 4.72E-06 | 0.0070048 |
| 12 | GO:0006335 | DNA replication-dependent nucleosome ass... | 16        | 6           | 0.54     | 8.33E-06 | 0.010472  |
| 13 | GO:0034723 | DNA replication-dependent nucleosome org... | 16        | 6           | 0.54     | 8.33E-06 | 0.010472  |
| 14 | GO:0019730 | antimicrobial humoral response              | 11        | 5           | 0.37     | 1.64E-05 | 0.0190864 |
| 15 | GO:0051290 | protein heterotetramerization               | 18        | 6           | 0.61     | 1.82E-05 | 0.019873  |
| 16 | GO:0065004 | protein-DNA complex assembly                | 99        | 13          | 3.33     | 2.50E-05 | 0.0255527 |
| 17 | GO:0002227 | innate immune response in mucosa            | 7         | 4           | 0.24     | 4.07E-05 | 0.0391057 |
| 18 | GO:0006342 | chromatin silencing                         | 64        | 10          | 2.16     | 4.84E-05 | 0.0439317 |

## **Supplemental Materials and Methods**

### **Fractionation into chromatin-associated (CA), nucleoplasm and cytoplasm RNA groups**

Hela cells were grown to 90% confluency in DMEM (Life Technologies) supplemented with 10% Fetal Bovine Serum (Omega), 2mM L-Glutamine (Life Technologies), 1U/mL Penicillin/Streptomycin (Life Technologies), 1x Non-essential Amino Acids (Life Technologies) and 0.1mM Beta-Mercaptoethanol (Sigma). Fractionations were performed as described previously (Pandya-Jones and Black, 2009). Briefly, cell pellets from a 90% confluent 10cm plate were gently scraped and collected in PBS at room temperature (4000rpm, 1min to pellet). Pellets were lysed in 200uL ice-cold Cytoplasmic Lysis Buffer for 5min on ice. Cellular lysates were passed through 500uL of an ice-cold Sucrose Cushion at 10000rpm, 4°C for 10min. The ~700uL cytoplasmic fraction was removed and used for protein analysis or further processed to obtain RNA samples (Pandya-Jones and Black, 2009). Pelleted nuclei were gently rinsed with 200uL ice-cold PBS and then re-suspended in 100uL ice-cold Glycerol Buffer prior to being lysed with 100uL ice-cold Nuclear Lysis Buffer. After vortexing for 2x2 seconds, nuclear lysates were incubated on ice for 2 minutes and then pelleted at 4°C, 14000rpm for 2 minutes. The soluble nuclear fraction was removed and used for protein analysis or further processed to obtain RNA samples (Pandya-Jones and Black, 2009). The chromatin pellet was gently rinsed with 200uL ice-cold PBS and then digested in 50uL 1xDNase I Buffer with 2U Turbo DNase (Thermo Fisher) at 37°C for 10 minutes. Protein samples were removed before dissolving the digested chromatin in 1mL of TRIzol (Life Technologies)

for RNA isolation. All centrifugations were conducted in eppendorf 5424 centrifuges either at room temperature or 4°C. All solutions were supplemented with 1x Complete Protease Inhibitors (Roche life sciences). In total, we prepared three biological replicates of cell fractionation into chromatin, nucleoplasm and cytoplasm. Both RNA-seq and m<sup>6</sup>A mapping analysis are highly reproducible among biological replicates, and we presented the figure that integrates the result of three biological replicates for Figure 1.

List of antibodies that were used in this study: anti-m<sup>6</sup>A, SYSY (Synaptic Systems) #202003; anti-METTTL3, Proteintech Group #15073-1-AP; anti-METTTL14, Sigma-Aldrich #HPA038002; normal rabbit IgG, Santa Cruz Biotechnology#sc-2027; anti-U1A, Abcam#ab55751; anti-U2AF65, Sigma-Aldrich#U4758; anti-RPFOX2, Bethyl Laboratories#A300-864A; anti-hnRNP M, Novus Biologicals#NB200-314; anti-Pol II, Santa Cruz Biotechnology#sc-899.

We also included in the supplemental method a protocol for m<sup>6</sup>A-CLIP (Ke et al., 2015) with a detailed day-to-day arrangement of experiments.

### **Quantification of m<sup>6</sup>A using LC-MS/MS**

The m<sup>6</sup>A mass spectrometry quantification (Figure 6A) was performed similarly to the method that we described previously (Ke et al., 2015). In details, RNA was hydrolyzed to ribonucleosides by 20 U benzonase (Santa Cruz Biotech), 0.2 U nuclease P1, and 0.1 U alkaline phosphatase (Sigma) in 10 mM ammonium acetate pH 6.0 and 1 mM magnesium chloride at 40 °C for 40 min, added 3 volumes of acetonitrile and centrifuged (16,000 g,

30 min, 4 °C). The supernatants were dried and dissolved in 50 µl water for LC-MS/MS analysis of m<sup>6</sup>A and unmodified ribonucleosides. Chromatographic separation was performed using an Agilent 1290 Infinity II UHPLC system with an ZORBAX RRHD Eclipse Plus C18 150 x 2.1 mm ID (1.8 µm) column protected with an ZORBAX RRHD Eclipse Plus C18 5 x 2.1 mm ID (1.8 µm) guard column (Agilent). The mobile phase consisted of water and methanol (both added 0.1 % formic acid) run at 0.25 ml/min, for m<sup>6</sup>A starting with 5% methanol for 0.5 min, followed by a 4 min gradient of 5-90 % methanol, and 4 min re-equilibration with 5 % methanol. A portion of each sample was diluted for the analysis of unmodified ribonucleosides which was chromatographed isocratically with 20 % methanol. Mass spectrometric detection was performed using an Agilent 6495 Triple Quadrupole system operating in positive electrospray ionization mode, monitoring the mass transitions 282.1/150.1 (m<sup>6</sup>A), 268.1/136.1 (A), 244.1/112.1 (C), 284.1/152.1 (G), and 245.1/113.1 (U).

### **Determination of m<sup>6</sup>A peak regions in exon vs. intron**

To rigorously classify m<sup>6</sup>A peaks into exonic vs. intronic regions, we used the complete set of transcript annotations according to GENCODE (version 19 of human hg19). If an m<sup>6</sup>A peak was located to any known exonic region, it was classified as an exonic m<sup>6</sup>A peak. If it was only located to an intronic region of transcripts, it was classified as an intronic m<sup>6</sup>A peak. Using alternative annotations (e.g. Ensembl 85/version 25 for human GRCh38) generates essentially the same result. To examine the distribution of m<sup>6</sup>A peaks in partially spliced mRNAs (Figure 1B and 1C), we focused on pre-mRNAs with abundant intronic RNA reads (i.e. intronic RNA reads were two times or more than

exonic RNA reads). Using data for all pre-mRNAs including those in which internal exons were completely or largely spliced (no or few introns), we obtained the same result: m<sup>6</sup>As in CA-RNAs are >93% in exons (see Figure 1B).

### Determining splicing completion for internal exons

The splicing completion for a specific internal exon (i.e. “spliced/(spliced+unspliced)(%)” in Figure 1A and “splicing completion index” in Figure 2A) is defined as the number of the spliced RNA molecules (S) divided by the number of total RNA molecules (spliced (S) plus unspliced (US))(Tilgner et al., 2012). S is calculated as the sum of two types of exon-exon junction reads: the exon-exon junction reads that spliced in this internal exon ( $0.5 \times (a+b)$ , a and b are the numbers of exon-exon junctions at each end of this internal exon, Figure 1) and that spliced out it (i.e. exon-exon junctions that connected the adjacent upstream exon to the adjacent downstream exon). US is calculated by enumerating the unspliced exon-intron junction reads ( $0.5 \times (c+d)$ , c and d are the numbers of exon-intron junctions at each end of this internal exon, Figure 1).

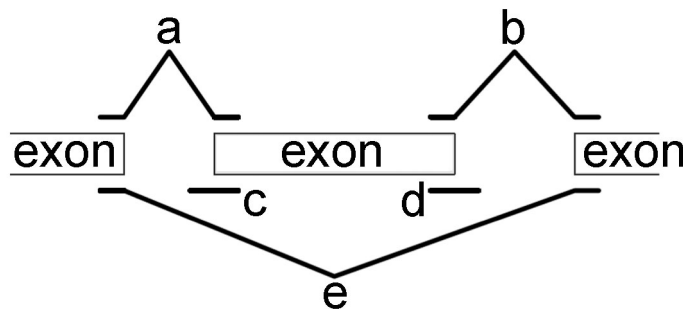

**Figure 1.** Definition of the splicing completion for a specific internal exon

The splicing completion for a specific intron (i.e. “spliced/(spliced+unspliced)(%)” in Supplemental Figure 1) is defined as the number of the spliced RNA molecules (S) divided by the number of total RNA molecules (spliced (S) plus unspliced (US)). In this case, S is the count of the exon-exon junction reads that have this intron spliced (a is the number of exon-exon junctions connecting the two ends of this intron, Figure 2) and US is the number of the unspliced exon-intron junction reads ( $0.5 \times (b+c)$ , b and c are the numbers of exon-intron junctions at each end of this intron, Figure 2). For all the exon-exon junction reads, we required at least 4nt overlap of the exon regions on both sides of the splice site. For exon-intron junction reads, we require at least 4nt overlap of the intron region on one end and of the exon region on the other end. To have reliable quantification, we focused on internal exons and introns with adequate read coverage by requiring at least 10 spliced and/or unspliced molecules. To remove possible contamination of intron retention events, we only considered internal exons and introns that were fully spliced in cytoplasm polyA+ RNA.

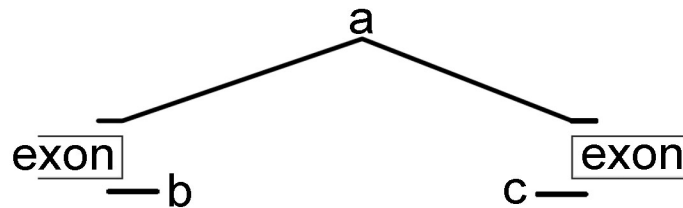

**Figure 2.** Definition of the splicing completion for a specific intron

**Distribution of m<sup>6</sup>A peak regions around start codons, stop codons and the start of last exons**

To unambiguously assign m<sup>6</sup>A peak regions to mRNAs according to gene annotations, we used a subset of GENCODE annotations (version 19 for human hg19 and version M10 for mouse mm10) by taking only one transcript isoform for each mRNA: we used the isoform with the longest mRNA length (alternatively we used the isoform with the most distal 3' end which generated essentially the same result). We then removed overlapping transcripts from the set to avoid any ambiguity in determining which transcript the m<sup>6</sup>A peak region was from.

We considered m<sup>6</sup>A peak regions that were within 1kb mRNA distance to stop codons and the fact that mRNAs had different lengths. We generated 100 intervals, each with a 10-nt size for 1 kb upstream of and downstream from the stop codons. We computed the “m<sup>6</sup>A peak region density” (i.e. “m<sup>6</sup>A peak density”) for each interval as follows: we scanned through all mRNAs of interest that contained this interval and examined whether an m<sup>6</sup>A peak region existed in this interval. We then enumerated those cases that contained m<sup>6</sup>A peak regions and divided this value by the total number of mRNAs that contained this interval. For the plot of m<sup>6</sup>A peak region density around the start of last exons and start codons, we performed the same analysis except anchoring at the start of the last exons and start codons.

### **Detection of pre-mRNA reads that have both intron and m<sup>6</sup>A containing exon sequences**

To identify pre-mRNA reads that have both intron and m<sup>6</sup>A containing exon sequences, we focused on precisely mapped m<sup>6</sup>A sites that are within 80nts of splice sites (the length

of our m<sup>6</sup>A sequencing reads is ~80nt). We required the read length in intronic region to be at least 4nt for these pre-mRNA reads. Furthermore, we also required the number of pre-mRNA reads at each case for CA-RNA be more than 2 as the reliable evidence of existence. In addition, these pre-mRNA reads should not exist in nucleoplasm and cytoplasm RNAs. We identified over 200 internal exons to have m<sup>6</sup>A-containing exon-intron junction fragments (the full list in Supplemental Table1 and 6 total examples in Figure 3B, 3C and Supplemental Figure 5).

### **Investigate m<sup>6</sup>A locations to splice sites (SS)**

To clearly show the distribution of m<sup>6</sup>A peaks relative to splice sites, we focused on internal exons with exon length at least 200nt so that the 100nt exon regions from 5'SS and 3'SS would not overlap (Figure 4A and 4C). The internal exons that are at least 200nt long contain about 80% of all internal exon m<sup>6</sup>As. “relative m<sup>6</sup>A peak density” for a fixed position to a splice site (Figure 4A and 4C) was calculated as the m<sup>6</sup>A peak density at that position scaled in proportion to the average m<sup>6</sup>A peak density in exonic regions at least 100nt away from splice sites. The panel Figure 4B shows that about 7% exonic m<sup>6</sup>As are within 50nts of splice sites for internal exons in Figure 4A (i.e. at least 200nt long). If we consider all m<sup>6</sup>A-containing internal exons including those exons less than 100nt long in which all m<sup>6</sup>A there are automatically within 50 nts distance to splice site, 20% exonic m<sup>6</sup>As are within 50nt of splice sites.

### **Determination of m<sup>6</sup>A peaks that are higher in CA-RNA**

To determine m<sup>6</sup>A peaks that are higher in CA-RNA, for each m<sup>6</sup>A peak region, we



enumerated reads of m<sup>6</sup>A-IP and the input for CA-RNA and Nucleoplasm RNA to evaluate the statistical significance (Fisher's exact test). Benjamini-Hochberg was implemented to adjust the P-value to the FDR for multiple testing. The requirement that an m<sup>6</sup>A peak region is higher in CA-RNA included that (1) the reads of mRNAs in m<sup>6</sup>A peak regions was adequate for m<sup>6</sup>A peak region detection in both CA-RNA and nucleoplasmic mRNA (RPKM  $\geq$  1), and (2) the m<sup>6</sup>A peak regions that are higher in CA-RNA were determined by requiring FDR  $\leq$  0.05 and an at least 2-fold higher of peak region enrichment in CA-RNA compared with nucleoplasmic mRNA. At a lower cutoff (e.g. 1.5 fold or higher), the same conclusion held, that most m<sup>6</sup>A peaks are modified with the same level between CA-RNA and nucleoplasmic mRNA. Comparison of individual m<sup>6</sup>A peak signal strength in nucleoplasmic RNA to cytoplasmic RNA for the same m<sup>6</sup>A peak was performed in the same way as the comparison between CA-RNA and nucleoplasmic RNA.

### **Quantification of splicing inclusion**

The splicing inclusion quantification was performed using Quantas ([https://zhanglab.c2b2.columbia.edu/index.php/Quantas\\_Documentation](https://zhanglab.c2b2.columbia.edu/index.php/Quantas_Documentation)). Significant changes in splicing are defined as delta PSI  $\geq$  0.1 and FDR < 5%, a statistical cutoff commonly used in splicing research for reliable splicing detection. Using another widely used splicing quantification software MISO (Katz et al., 2010) produced a similar result. We also analyzed the raw RNAseq data of previous publications that reported certain splicing changes upon comprising Mettl3 expression levels (Supplemental Fig 9, (Dominissini et al., 2012; Zhao et al., 2014; Geula et al., 2015) (Liu et al., 2015)), and

found the same result that exons splice mostly the same when their exonic m<sup>6</sup>As were lost.

### **Determination of mRNA half-life ( $T_{1/2}$ )**

We determined the  $T_{1/2}$  of individual polyA<sup>+</sup> mRNAs in mouse embryonic stem cells (ESC) and Mettl3 knockout (KO) by sequencing after 5 time points (0hr, 1hr, 2hrs, 4hrs and 8hrs) of actinomycin (final concentration of 5ug/mL, Sigma #A9415) treatment in three biological replicates. The  $T_{1/2}$  was determined as  $\ln(2)/k$ ,  $k$  is the decay rate constant. The individual mRNA abundance levels at different time points after actinomycin D treatment were fitted to a first-order exponential decay curve to calculate the decay rate constant ( $k$ ). A single  $T_{1/2}$  was calculated for each mRNA by using all three replicate values at each time point. For downstream detailed analysis, we only considered the  $T_{1/2}$  for individual mRNA with a reliable statistics (i.e. FDR<0.05, fitting the exponential decay model by t distribution) (Wang et al., 2002; Neff et al., 2012). We used the published mRNA  $T_{1/2}$  data for HeLa cells (Tani et al., 2012) to overlay HeLa cell m<sup>6</sup>A data with mRNA  $T_{1/2}$  (Figure 5A). Using the mRNA  $T_{1/2}$  data in human hepatoma cancer cells from an independent group (Yang et al., 2003), we obtained similar association of more m<sup>6</sup>As in mRNAs and shorter  $T_{1/2}$  (Supplemental Figure 10).

The m<sup>6</sup>A mini-gene for mRNA half-life validation was constructed based on a common retroviral GFP vector (Addgene#1764, puromycin as the selection marker for successful DNA integration). The mRNA regions containing m<sup>6</sup>A sites were cloned in frame into the minigene at Multiple Clone Sites (MCS) that was at the end of the coding region of

GFP. Synonymous point mutations were carefully made to disrupt m<sup>6</sup>A RAC core motif while not change the underlying protein coding sequence.

The detailed sequence for Ppp1r8 construct is (three precise m<sup>6</sup>A sites by m<sup>6</sup>A-CLIP (Ke et al., 2015) are marked in red, specific amino acid codons were marked out in coding region)

“AAGCGGATGGAGGGCTCTGGCTCTCTGGGCCTGGAGGAGTCGGGGAGCAGG  
CGCATGCAGAAC (AAC was mutated to AAT, Asn/N synonymous mutation)  
TTTGCCTTCAGTGGAGGA (GGA was mutated to GGT, Gly/G synonymous mutation)  
CTATATGGGGCCTGCCCCACACACAGTGAAACGGGCTCCAGCCGCATG  
GCATTCATGGGACAGCGCTCATTGGTGGCTTGCCCATGCCATACCCGAACCTC  
GCCCCTGATGTGGAC (GAC was mutated to GAT, Asp/D synonymous mutation)  
TTGACTCCTGTTGTGCCATCAGCAGTGGCCATAAATCCCACACCAAACCCTGC  
AGTCTATAACCCTGAGGCTGTGAATGAACCAAGAAGAAGAAATACGCGAA  
GGAGGCTTGGCCGGGCAAGAAGCCACACCTTCCTTACTGATTTGATATTTTG  
GTTATGGAGAGGGTGG”;

The detailed sequence for Sox2 construct is (fifteen precise m<sup>6</sup>A sites by m<sup>6</sup>A-CLIP (Ke et al., 2015) are marked in red, specific amino acid codons were marked out in coding region)

“ATGGGCTCTGTGGTCAAGTCCGAGGCCAGCTCCAGCCCCCGTGGTTACCT  
CTCCTCCCACCTCCAGGGCGCCCTGCCAGGCCGGGGAC (GAC was mutated to  
GAT, Asp/D synonymous mutation) CTCCGGGAC (GAC was mutated to GAT, Asp/D  
synonymous mutation)

ATGATCAGCATGTACCTCCCCGGCGCCGAGGTGCCGGAGCCCGCTGCGCCCA  
GTAGA (AGA was mutated to AGG, Arg/R synonymous mutation)  
CTGCACATGGCCCAGCACTACCAGAGCGGCCCGGTGCCCGGCACGGCCATTA  
AC (AAC was mutated to AAT, Asn/N synonymous mutation)  
GGCACACTGCCCTGTTCGCACATGTGAGGGCTGGA (A mutated to T)  
CTGCGAA (A mutated to T)  
CTGGAGAAGGGGAGAGATTTTCAAAGAGATACAAGGGAATTGGGAGGGGTG  
CAAAAAGAGGAGAGTAGGAAAAATCTGATAATGCTCAAAAGGAAAAAAAT  
CTCCGCAGCGAAACGACAGCTGCGGAAAAAA (A mutated to T)  
CCACCAATCCCATCCAAATTA (A mutated to T) CGCAAAA (A mutated to T)  
CCGTGATGCCG (A mutated to T) CTAGAAA (A mutated to T)  
CTTTTATGAGAGATCTTGGGA (A mutated to T) CTTCTTTTGGGGGA (A  
mutated to T)  
CTATTTTTGTACAGAGAAAACCTGAGGGCGGCCGGGGAGGGCGGGGGAATCG  
GA (A mutated to T) CCATGTATAGATCTGGAGGAAAAAACTACGCAAAA (A  
mutated to T) CTTTTTTTTAAAGTTCTAGTGGTACGTTAGGCGCTTC”

**Determination of m<sup>6</sup>A peak regions lost in knockout (KO) of Mettl3 in mouse embryonic stem cells (ESC)**

Global quantification of m<sup>6</sup>A by mass spectrometry was practiced according to a protocol described previously (Ke et al., 2015). To determine m<sup>6</sup>A peak regions that were lost due to Mettl3 KO in mouse ESC (embryonic stem cells), we practiced the analysis as reported previously (Ke et al., 2015). For each m<sup>6</sup>A peak region, we enumerated reads of

m<sup>6</sup>A-IP and the input for wild-type (WT) and KO mouse ESCs to evaluate the statistical significance (Fisher's exact test). Benjamini-Hochberg was implemented to adjust the P-value to the FDR for multiple testing. The requirement that an m<sup>6</sup>A peak region is considered lost due to Mettl3 KO demanded that (1) the mRNAs containing these m<sup>6</sup>A peak regions should be adequately expressed in both WT and KO mouse ESC (RPKM  $\geq$  1), (2) the expression of mRNAs in m<sup>6</sup>A peak regions was adequate for m<sup>6</sup>A peak region detection in both KO and WT (RPKM  $\geq$  1), and (3) the m<sup>6</sup>A peak regions being lost due to Mettl3 KO were determined by requiring FDR  $\leq$  0.05 and an at least 2-fold decrease of peak region enrichment in KO compared with WT.

## Reference

- Dominissini D, Moshitch-Moshkovitz S, Schwartz S, Salmon-Divon M, Ungar L, Osenberg S, Cesarkas K, Jacob-Hirsch J, Amariglio N, Kupiec M, Sorek R, Rechavi G. 2012. Topology of the human and mouse m6A RNA methylomes revealed by m6A-seq. *Nature* **485**: 201–206.
- Geula S, Moshitch-Moshkovitz S, Dominissini D, Mansour AA, Kol N, Salmon-Divon M, Hershkovitz V, Peer E, Mor N, Manor YS, Ben-Haim MS, Eyal E, Yunger S, Pinto Y, Jaitin DA, Viukov S, Rais Y, Krupalnik V, Chomsky E, Zerbib M, Maza I, Rechavi Y, Massarwa R, Hanna S, Amit I, Levanon EY, Amariglio N, Stern-Ginossar N, Novershtern N, Rechavi G, Hanna JH. 2015. Stem cells. m6A mRNA methylation facilitates resolution of naive pluripotency toward differentiation. *Science* **347**: 1002–1006.
- Katz Y, Wang ET, Airoidi EM, Burge CB. 2010. Analysis and design of RNA sequencing experiments for identifying isoform regulation. *Nat Methods* **7**: 1009–1015.
- Ke S, Alemu EA, Mertens C, Gantman EC, Fak JJ, Mele A, Haripal B, Zucker-Scharff I, Moore MJ, Park CY, Vagbo CB, Kussnierczyk A, Klungland A, Darnell JEJ, Darnell RB. 2015. A majority of m6A residues are in the last exons, allowing the potential for 3' UTR regulation. *Genes Dev* **29**: 2037–2053.
- Liu N, Dai Q, Zheng G, He C, Parisien M, Pan T. 2015. N(6)-methyladenosine-dependent RNA structural switches regulate RNA-protein interactions. *Nature* **518**: 560–564.
- Neff AT, Lee JY, Wilusz J, Tian B, Wilusz CJ. 2012. Global analysis reveals multiple pathways for unique regulation of mRNA decay in induced pluripotent stem cells. *Genome Res* **22**: 1457–1467.

Pandya-Jones A, Black DL. 2009. Co-transcriptional splicing of constitutive and alternative exons. *RNA* **15**: 1896–1908.

Tani H, Mizutani R, Salam KA, Tano K, Ijiri K, Wakamatsu A, Isogai T, Suzuki Y, Akimitsu N. 2012. Genome-wide determination of RNA stability reveals hundreds of short-lived noncoding transcripts in mammals. *Genome Res* **22**: 947–956.

Tilgner H, Knowles DG, Johnson R, Davis CA, Chakraborty S, Djebali S, Curado J, Snyder M, Gingeras TR, Guigo R. 2012. Deep sequencing of subcellular RNA fractions shows splicing to be predominantly co-transcriptional in the human genome but inefficient for lncRNAs. *Genome Res* **22**: 1616–1625.

Wang Y, Liu CL, Storey JD, Tibshirani RJ, Herschlag D, Brown PO. 2002. Precision and functional specificity in mRNA decay. *Proc Natl Acad Sci U S A* **99**: 5860–5865.

Yang E, van Nimwegen E, Zavolan M, Rajewsky N, Schroeder M, Magnasco M, Darnell JEJ. 2003. Decay rates of human mRNAs: correlation with functional characteristics and sequence attributes. *Genome Res* **13**: 1863–1872.

Zhao X, Yang Y, Sun BF, Shi Y, Yang X, Xiao W, Hao YJ, Ping XL, Chen YS, Wang WJ, Jin KX, Wang X, Huang CM, Fu Y, Ge XM, Song SH, Jeong HS, Yanagisawa H, Niu Y, Jia GF, Wu W, Tong WM, Okamoto A, He C, Rendtlew Danielsen JM, Wang XJ, Yang YG. 2014. FTO-dependent demethylation of N6-methyladenosine regulates mRNA splicing and is required for adipogenesis. *Cell Res* **24**: 1403–1419.

A protocol for m<sup>6</sup>A-CLIP (Ke et al., 2015) with a detailed arrangement of experiments into different days

## **O. RNA preparation (Day 1):**

**O1a: Protocol:** Total RNAs were isolated from cells and tissues according to manufacturer's instructions using TRIzol reagent (Cat.# 15596, Life Technologies), then was suspended in RNA-free water, digested with RQ1 RNase-Free DNase (Cat. # M6101, Promega) for 20 min at 37°C and then subject to phenol/chloroform extraction and ethanol precipitation. The resulted total RNA pellet was re-suspended in RNA-free water. PolyA+ RNAs were selected using Dynabeads® mRNA Purification Kit (Cat.# 61006, Invitrogen) according to the manufacturer's protocol.

### **O1b: Recipes and steps:**

#### **RQ1 DNase treatment master mix (200ul reaction volume):**

100ul total RNA  
20ul 10X RQ1 DNase Buffer  
25ul RQ1 DNase  
5ul RNasin® Ribonuclease Inhibitor  
50ul H<sub>2</sub>O

**Incubate at 37°C**, shake at 1200 rpm for 20 minutes

#### **Phenol/Chloroform extraction master mix (after DNase treatment):**

200ul RQ1 DNase treatment post-reaction solution  
200ul Phenol  
65ul Chloroform

Vortex briefly, and incubate at 37°C, shake at 1200 rpm for 20 minutes, vortex briefly again, spin down @15000rpm for 5 minutes

#### **Transfer the supernatant to the Ethanol precipitation mixture:**

~200ul supernatant  
4ul glycogen (if necessary)  
25ul NaOAc  
800ul Ethanol (100%)

Incubate at -80C or -20C for 1 hour or more.

Then spin at 14000rpm for 20 minutes 4C to have the pellet, wash twice with 75% ethanol, dry for 5 minutes, and re-suspend in water. For the downstream polyA+ RNA selection, we stick to the protocol provided by the vendor

<https://www.thermofisher.com/us/en/home/references/protocols/nucleic-acid-purification-and-analysis/mrna-protocols/dynabeads-mrna-purification-kit.html#prot2>

## **A. M6A-IP: (Day 2~5)**

**A1a: Protocol:** The PolyA+ RNA was fragmented to 20~80nt nucleotide fragments by alkaline hydrolysis (1mM EDTA, 6mM Na<sub>2</sub>CO<sub>3</sub>, 44mM NaHCO<sub>3</sub>, pH~9.3) at 95°C for 18 minutes, then the RNA fragments precipitated following standard ethanol precipitation. The fragmented polyA+ RNAs (3ug) were subject to PAGE selection for 20nt~80nt size.

### **A1b: Recipes and steps:**

The fragmentation buffer is home-made and stored as 2X concentration (frozen, open for use only once to make sure freshness)

#### **RNA fragmentation master mix (40ul reaction volume, incubate in PCR tube)**

20ul 2X RNA fragmentation buffer  
(2mM EDTA, 12mM Na<sub>2</sub>CO<sub>3</sub>, 88mM NaHCO<sub>3</sub>, pH~9.3)  
20ul PolyA+ RNA

Incubate at 95°C for 18 minutes

#### **Standard ethanol precipitation master mix**

40ul RNA fragmentation solutions  
8ul glycogen  
10ul NaOAc  
42ul H<sub>2</sub>O  
400ul EtOH

Incubate at -80C or -20C for 1 hour or more.

**A2a Overview:** Dynabeads Protein A beads (250ul, Cat. # 10008D, Life Technologies) was pretreated with BSA (Cat. # B9000S, NEB) for 45 minutes at room temperature to



reduce background. Anti-m<sup>6</sup>A rabbit polyclonal antibody (25ug, Cat. # 202003, Synaptic Systems) was then conjugated to Dynabeads Protein at room temperature for 1 hour.

### **A2b: Recipes and steps:**

250ul Protein-A Dynabeads per sample

Wash 3 times with 1mL 1x Ab binding buffer (1X PBS, pH 7.4; 0.02% Tween-20)

#### **Dynabeads Protein A beads BSA incubation mix: (total volume: ~256ul)**

Protein-A Dynabeads

250ul 1x Ab binding buffer

6.25ul BSA (Cat. # B9000S, NEB)

After rotating at room temperature for 45 minutes, the beads is washed three times with 1mL 1x Ab Binding Buffer

#### **Anti-m<sup>6</sup>A rabbit polyclonal antibody incubation mix: (total volume: ~280ul)**

Protein-A Dynabeads

25ul Anti-m<sup>6</sup>A rabbit polyclonal antibody (25 ug)

6.25ul BSA (Cat. # B9000S, NEB)

250ul 1xAb binding Buffer

Rotate at RT for at least 45 minutes - 1 hour, then wash beads with 1mL 1xPXL buffer (1x PBS, 0.1% SDS, 0.5% Sodium Deoxycholate and 0.5% NP-40) three times before IP.

**A3a Overview:** The polyA<sup>+</sup> RNA fragments (3ug) were incubated with the antibody in

1x PXL buffer (1x PBS, 0.1% SDS, 0.5% Sodium Deoxycholate and 0.5% NP-40)

supplemented with 2% RNasin® Plus RNase Inhibitor (Cat. # N2615, Promega) for 2

hours at 4°C.

### **A3b: Recipes and steps:**

#### **m<sup>6</sup>A-IP mixture: (300ul total liquid volume)**

10ul RNA fragments

6ul RNasin® Plus RNase Inhibitor (Cat. # N2615, Promega)

150ul 2x PXL

134ul H<sub>2</sub>O

Rotate at 4C for 2 hours.

**A4a Overview:** After incubation, the bead and antibody was washed 5 times by 4 different wash buffers: first twice by ice cold Nelson Low Salt Buffer (15mM Tris pH7.5 and 5mM EDTA), once by ice cold Nelson High Salt Buffer (15mM Tris pH7.5, 5mM EDTA, 2.5mM EGTA, 1% Triton X-100, 1% Sodium Deoxycholate, 0.1% SDS and 1M NaCl), once by ice cold Nelson Stringent Wash Buffer (15mM Tris pH7.5, 5mM EDTA, 2.5mM EGTA, 1% Triton X-100, 1% Sodium Deoxycholate, 0.1% SDS, 120mM NaCl and 25mM KCl) and last wash by ice cold NT-2 Buffer (50mM Tris pH7.4, 150mM NaCl, 1mM MgCl<sub>2</sub> and 0.05% NP-40).

**A4b: Recipes and steps:**

Rotating at 4C for 2 hours

- ➔ Wash beads twice with 1mL ice-cold Nelson Low Salt buffer (15mM Tris pH7.5 and 5mM EDTA)
- ➔ Once with 1mL ice-cold Nelson High Salt Buffer (15mM Tris pH7.5, 5mM EDTA, 2.5mM EGTA, 1% Triton X-100, 1% Sodium Deoxycholate, 0.1% SDS and 1M NaCl),
- ➔ Once by 1mL ice-cold Nelson Stringent Wash Buffer (15mM Tris pH7.5, 5mM EDTA, 2.5mM EGTA, 1% Triton X-100, 1% Sodium Deoxycholate, 0.1% SDS, 120mM NaCl and 25mM KCl)
- ➔ Last wash by 1mL ice-cold NT-2 Buffer (50mM Tris pH7.4, 150mM NaCl, 1mM MgCl<sub>2</sub> and 0.05% NP-40).

**A5a: Overview:** After the stringent wash series, the bead and antibody was split into two halves: one half performed m<sup>6</sup>A-CLIP leg, and the other half had its bounded RNA eluted with 0.5mg/mL N<sup>6</sup>-methyladenosine sodium salt (Cat. # M2780, Sigma-Aldrich) at 4°C for 1 hour (m<sup>6</sup>A-IP leg). The eluted RNA was ethanol precipitated and re-suspended in RNase-free water for downstream cDNA library preparation.

### **A5b: Recipes and steps:**

#### **M6A elution solution mix: (total volume 200ul)**

20ul N6-methyladenosine sodium salt (5mg/mL)  
40ul 5 X IP buffer (1.5X SSPE; 5mM EDTA; 0.25% Tween-20)  
8ul RNasin® Plus RNase Inhibitor (Cat. # N2615, Promega)  
132ul H2O

Rotate at 4C for 1 hour, collect the supernatant solution, and perform standard ethanol precipitation.

**A6a: Overview:** The eluted RNA from the m6A-IP step and the input RNA fragments were first treated with T4 PNK to remove its 3'phosphor group and then ligated to 68 pmol preadenylated DNA linker (L32 from IDT) with T4 RNA ligase 2 and truncated KQ (New England Biolabs, catalog no. M0373L) overnight at 16°C. This ligation mixture was subject to 8% PAGE purification to harvest the ligated product.

### **A6b: Recipes and steps:**

#### **T4 PNK reaction mixture (total volume: 40ul)**

10ul RNA fragments  
4ul 10x PNK buffer  
4ul T4 PNK enzyme  
2ul RNasin® Plus RNase Inhibitor (Cat. # N2615, Promega)  
20ul H2O

Incubate at 37C for 20minutes, and then receive standard ethanol precipitation to remove the PNK enzymes and its buffer.

#### **Linker ligation reaction mixture (total volume: 30ul)**

10ul RNA fragments  
3ul 10x ligation buffer  
1ul RNasin® Plus RNase Inhibitor (Cat. # N2615, Promega)  
2ul T4 RNA Ligase 2, truncated KQ (Cat. # M0373L, NEB)  
1.25ul L32 preadenylated DNA linker (68pmol)  
6ul 50% PEG  
6.75ul H2O

Incubate at 16C overnight, and then receive standard ethanol precipitation to remove the ligase and its buffer. The resulted pallet is subject to 8% PAGE purification to harvest the ligated product.

## **B. M6A-CLIP: (Day 6~8)**

**B1a: Protocol:** The remaining half of m<sup>6</sup>A antibody was incubated with 1x IP buffer (0.3x SSPE, 1mM EDTA and 0.05% Tween-20), subject to UV crosslink (UV Stratalinker 2400, Stratagene) and then washed again 5 times by 4 different wash buffers: twice by Nelson Low Salt Buffer, once by Nelson High Salt Buffer, once by Nelson Stringent Wash Buffer and once by NT-2 Buffer to further reduce background.

**B1b: Recipes and steps:**

**M6A-CLIP UV incubation mixture: (total volume 200ul)**

40ul 5xIP buffer (1.5X SSPE; 5mM EDTA; 0.25% Tween-20)  
4ul RNasin® Plus RNase Inhibitor (Cat. # N2615, Promega)  
156ul H<sub>2</sub>O

The sample is transferred to a 6-well cell culture dish on ice and UV crosslink twice with 200 mJ cm<sup>2</sup> intensity per crosslink.

After UV crosslink, the beads is washed 5 times by 4 different wash buffers:

- ➔ 1mL ice-cold Nelson Low Salt Buffer twice
- ➔ 1mL ice-cold Nelson High Salt Buffer once
- ➔ 1mL ice-cold Nelson Stringent Wash Buffer once
- ➔ 1mL ice-cold NT-2 Buffer once

**B2a: Protocol:** After this wash series, the m<sup>6</sup>A antibody received on-bead PNK treatment (T4 PNK, Cat. # M0201L, NEB) to remove 3'phospho group of its UV-crosslinked RNAs at 37°C for 20 minutes.

**B2b: Recipes and steps:**

**The PNK reaction mixture: (total volume 40ul)**

4ul 10x PNK buffer  
4ul T4 PNK enzyme  
2ul RNasin® Plus RNase Inhibitor (Cat. # N2615, Promega)  
30ul H<sub>2</sub>O

The mixture is incubated at 37C for 20 mins. (Shake at 1200rpm for 15" every 1'30")

**B2a: Protocol:** After 3 washes with 1x PNK buffer (50mM Tris-HCl pH 7.4, 10mM MgCl<sub>2</sub> and 0.5% NP-40) to remove remaining PNK enzyme, the m<sup>6</sup>A antibody was

subject on-bead linker ligation with T4 RNA Ligase 2, truncated KQ (Cat. # M0373L, NEB) and 68 pmol pre-adenylated DNA linker (L32, ordered from IDT) overnight at 16°C.

**B2b: Recipes and steps:**

**The T4 RNA Ligase mixture: (total volume 80ul)**

45ul H<sub>2</sub>O  
8ul 10x Buffer  
2ul RNasin® Plus RNase Inhibitor (Cat. # N2615, Promega)  
5ul L32 pre-adenylated DNA linker (68 pmol in total)  
4ul T4 RNA Ligase 2, truncated KQ (Cat. # M0373L, NEB)  
16ul 50% PEG

The mixture is incubated at 16C overnight (Shake at 1200rpm for 15'' every 1'30'')

**B3a: Protocol:** The ligated product were subject to <sup>32</sup>P-gamma-ATP PNK hot labeling, and then the m<sup>6</sup>A antibody and its crosslinked RNA targets were eluted off beads by incubating with 6ul 1M DTT (Cat. # D0632, Sigma-Aldrich), 24ul 1x PNK buffer and 30ul Invitrogen 4x LDS sample buffer (Cat. # NP0007, Invitrogen) at 70 °C for 10 minutes.

**B3b: Recipes and steps:**

**The <sup>32</sup>P-gamma-ATP PNK hot labeling mixture: (total volume 40ul)**

4ul 10x PNK buffer  
2ul T4 PNK enzyme  
2ul <sup>32</sup>P-gamma-ATP  
30ul H<sub>2</sub>O  
2ul RNasin® Plus RNase Inhibitor (Cat. # N2615, Promega)

Incubate at 37C for 10mins (Shake at 1200rpm for 15'' every 1'30'')

Then wash the beads 3 times with ice-cold 1xPNK buffer (1mL each time) to remove residual <sup>32</sup>P-gamma-ATP.

**Elution mixture (total volume: 60ul)**

6ul 1M DTT (Cat. # D0632, Sigma-Aldrich)

24ul 1x PNK buffer  
30ul Invitrogen 4x LDS sample buffer (Cat. # NP0007, Invitrogen)

Incubate at 70C for 10minutes

**B4a: Protocol:** The eluted product received SDS-PAGE and was then transfer to a nitrocellulose membrane (Cat. # 162-0112, BIO-RAD) to harvest RNAs UV-crosslinked to m<sup>6</sup>A antibody. The membrane bound with RNAs was cut out and digested of the protein by proteinase K (Cat. # 03115828001, Roche). The freed RNA (already ligated to L32 linker previously) was purified by phenol/chloroform extraction and ethanol precipitation, and then re-suspended in RNA-free water ready for downstream BrdU-CLIP library preparation.

**B4b: Recipes and steps:**

**The 4mg/mL proteinase K solution: (total volume 240ul)**

40ul 20mg/mL proteinase K solution stock  
200ul 1xPK buffer (100mM Tris-HCl pH 7.5; 50mM NaCl; 10mM EDTA)

**PK-7M Urea solution: (total volume ~500ul)**

0.21g Urea  
500ul 1xPK buffer  
(Urea is hard to dissolve, prepare early to make sure the timely usage)

Add 200ul out of 240ul **The 4mg/mL proteinase K solution** to the cut RNA-bound membrane and incubate at 37C for 20 minutes (shaking at 1000rpm constantly); then add 200ul **PK-7M urea solution**, incubate for another 20 minutes at 37C (shaking at 1000rpm).

(In hood) add 400ul Phenol and 130ul Chloroform; vortex to mix and incubate @37C for 20 minutes (shanking at 1000rpm)  
Vortex briefly, spin down @15000rpm for 5 minutes,

Transfer the supernatant to the standard ethanol precipitation mixture:

Incubate at -80C or -20C for 1 hour or more. Then spin at 14000rpm for 20 minutes 4C to have the pallet, wash twice with 75% ethanol, dry for 5 minutes, and re-suspend in water for downstream BrdU-CLIP.

## C. BrdU-CLIP library preparation: (Day 9~10, this part is shared with standard CLIP experiment, in collaboration with Aldo Mele)

### C1. Bead Prep: Denhardt's Blocking

#### Ab Binding Buffer:

1X PBS, pH 7.4

0.02% Tween-20

50µl Protein-G Dynabeads per sample (25µl per cDNA purification step), include -RT and/or -Template

Wash 3 times with Ab binding buffer

Add 225µl Ab binding buffer, 25µl 50X Denhardt's Solution (Sigma, D2532 or Invitrogen, 750018); total volume is 5X original bead volume

Rotate at RT for at least 45 minutes - 1 hour

### C2. RT Reaction:

Add 8µl water to RNA pellet (tap to resuspend, quick spin down). Denature at 65°C for 5 minutes (in microfuge tube), place tube on ice (to avoid loss of RNA, do not over-dry pellet and do not pipette until after denaturing step)

Transfer to PCR tube (on ice)

#### Mix I:

4µl 5X RT Buffer

1µl dATP

1µl dCTP

1µl dGTP

1µl Br-dUTP (8.2mM; Sigma, B0631)

1µl RT Primer (25µM)

9µl total

} 8.2mM (Invitrogen, 10297-018)

Add 9µl of Mix I

3 minutes at 75°C, ramp down to 55°C and hold

#### Mix II:

1µl DTT (0.1M)

1µl RNAsin Plus (Promega, N261)

1µl Superscript III  
3µl total

Add 3µl of Mix II (pre-warm to 55°C in PCR block before adding)

30 minutes at 55°C, 5 minutes at 85°C, 4°C hold

### **C3. Bead Prep: Ab Binding**

#### **1X IP Buffer:**

0.3X SSPE  
1mM EDTA  
0.05% Tween-20

Wash 3 times with Ab binding buffer

Add 20µl Ab binding buffer, 5µl 50X Denhardt's Solution and 25µl (5µg) αBrdU antibody (Millipore, MAB3222; Abcam, ab8955)

Rotate at RT for at least 45 minutes

Wash 3 times with 1X IP Buffer

Following RT reaction, add 1µl (at 2U/µl) RNase H (Invitrogen 18021-071 or NEB M0297L)

Incubate for 20 minutes at 37°C, hold at 4°C

Add 10µl water (to bring volume above 25µl needed for G-25 column)

Spin through G-25 column to remove free BrdUTP (discard G-25 column as solid radioactive waste)

### **C4. cDNA Purification: Immunoprecipitation I**

#### **2X IP Buffer:**

0.6X SSPE  
2mM EDTA  
0.1% Tween-20

#### **Nelson Low Salt Buffer:**

15mM Tris pH 7.5  
5mM EDTA



### Nelson Stringent Buffer:

15mM Tris-HCl pH7.5  
5mM EDTA  
2.5mM EGTA  
1% Triton X-100  
1% NaDOC  
0.1% SDS  
120mM NaCl  
25mM KCl

Measure volume, add water up to 40 $\mu$ l and add 10 $\mu$ l 50X Denhardt's Solution and 50 $\mu$ l 2X IP Buffer for a total volume of 100 $\mu$ l (Denhardt's and 2X IP Buffer can be added to the G-25 column collection tube prior to spinning samples through, volume can then be adjusted up to 100 $\mu$ l)

5 minutes at 70°C, equilibrate to RT

Add to prepared tube of beads (25 $\mu$ l original slurry volume, store remaining beads for second purification at 4°C O/N), rotate at RT for 45 minutes

(all washes 3-5 minutes rotating at RT, 1ml)

Wash 1 time with 1X IP Buffer (5X Denhardt's)  
2 times with Nelson Low Salt Buffer (1X Denhardt's)  
2 times with Nelson Stringent Buffer (1X Denhardt's)  
2 times with 1X IP Buffer

## **C5. Heat Elution:**

### Elution Buffer:

50 $\mu$ l 2X IP Buffer  
40 $\mu$ l Water  
90 $\mu$ l

Add 90 $\mu$ l elution buffer to each tube of beads

Incubate at 98°C for 1 minute in thermomixer (1200 rpm) to elute cDNA from beads and place on magnet

Collect eluate and add 10 $\mu$ l 50X Denhardt's to each for a total of 100 $\mu$ l

Store overnight at 4°C

## **C6. cDNA Purification: Immunoprecipitation II**

### **CircLigase Wash Buffer:**

33mM Tris-Acetate  
66mM KCl  
(pH 7.8)

5 minutes at 70°C, equilibrate to RT

Add to prepared tube of beads, rotate at RT for 45 minutes

(all washes 3-5 minutes rotating at RT, 1ml)

Wash 1 time with 1X IP Buffer (5X Denhardt's)  
2 times with Nelson Low Salt Buffer (1X Denhardt's)  
2 times with Nelson Stringent Buffer (1X Denhardt's)  
2 times with CircLigase wash buffer

## **C7. Circularization: CircLigase**

### **Phusion Wash Buffer:**

50mM Tris  
(pH 8.0)

### **Reaction Mix:**

2µl CircLigase 10X Reaction Buffer  
4µl Betaine (5M)  
1µl MnCl<sub>2</sub> (50mM)  
1µl CircLigase ssDNA Ligase II (100U) (Epicentre, CL9021K)  
12µl Water  
20µl total

Incubate 1 hour at 60°C in thermomixer (interval: shake at 1300rpm every 30" for 15")

(all washes 3-5 minutes rotating at RT, 1ml)

Wash 2 times with Nelson Low Salt Buffer  
2 times with Nelson Stringent Buffer  
2 times with Phusion wash buffer

## C8. PCR: Phusion Polymerase, SYBR Green

### Mix I:

10 $\mu$ l 5X Phusion HF Buffer  
1 $\mu$ l 10mM dNTPs  
37 $\mu$ l Water  
48 $\mu$ l total

### Mix II:

0.5 $\mu$ l P5 (20 $\mu$ M)  
0.5 $\mu$ l P3 (20 $\mu$ M)  
0.5 $\mu$ l Phusion DNA Polymerase (NEB, M0530)  
1.5 $\mu$ l total

Add 48 $\mu$ l Mix I to beads

Incubate at 98°C for 1 minute in thermomixer (1200 rpm) to elute cDNA from beads and place on magnet

Collect eluate and place in PCR tube with optically clear cap

Add 1.5 $\mu$ l Mix II, 0.5 $\mu$ l 50X SYBR Green I (dilute 10,000X stock to 50X in Phusion wash buffer) to mix and place in real-time PCR machine

Cycle:

98°C 30"

98°C 10"

58°C 15"

72°C 20"

Remove reaction tube when RFU signal reaches ~250-500 (usually results in 2.5-5nM)

Purify PCR product using Agencourt AMPure XP beads (Beckman Coulter) according to manufacturers instructions

Quantitate using Tapestation, pool samples according to tapestation results.

### **MiSeq:**

Dilute to 2nM, sequence on MiSeq at 5pM final concentration using standard Read 1 primer already on cartridge.

### **HiSeq:**

Dilute to 2-10nM Submit for HiSeq sequencing using standard Read 1 sequencing primer listed below.

**DP5\_PE:** (Allowing standard PE primer)

AATGATACGGCGACCACCGAGATCTACACTCTTTCCCTAC**ACGACGCTCTTCCGATCT**

The 1<sup>st</sup> Sequencing primer (READ1)

ACACTCTTTCCCTAC**ACGACGCTCTTCCGATCT**

**SP3-PE**

CAAGCAGAAGACGGCATACGAGATCTCGGCATTCCTG**CCGCTGGAAGTGACTGACAC**

**The 2<sup>nd</sup> Sequencing primer (SSP2)**

TCGGCATTCCTG**CCGCTGGAAGTGACTGACAC**

L32

/5rApp/GTGTCAGTCACTTCCAGCGG/3ddc/ (RS of  
**CCGCTGGaaGTGaCTGaCa**)

>**LiK\_PEDDD-1 (50nt)**

/5Phos/DDD**CGAT**NNNNNNNN**AGATCGGAAGAGCGTCGT**/iSp18/CACTCA/iSp18/  
**CCGCTGGaaGTGaCTGaC-3**

>**LiK\_PEDDD-2 (50nt)**

/5Phos/DDD**TAGC**NNNNNNNN**AGATCGGAAGAGCGTCGT**/iSp18/CACTCA/iSp18/  
**CCGCTGGaaGTGaCTGaC-3**

>**LiK\_PEDDD-3 (50nt)**

/5Phos/DDD**ATCG**NNNNNNNN**AGATCGGAAGAGCGTCGT**/iSp18/CACTCA/iSp18/  
**CCGCTGGaaGTGaCTGaC-3**

>**LiK\_PEDDD-4 (50nt)**

/5Phos/DDD**GCTA**NNNNNNNN**AGATCGGAAGAGCGTCGT**/iSp18/CACTCA/iSp18/  
**CCGCTGGaaGTGaCTGaC-3**

>**LiK\_PEDDD-5 (50nt)**

/5Phos/DDD**CTAG**NNNNNNNN**AGATCGGAAGAGCGTCGT**/iSp18/CACTCA/iSp18/  
**CCGCTGGaaGTGaCTGaC-3**

>**LiK\_PEDDD-6 (50nt)**

/5Phos/DDD**GATC**NNNNNNNN**AGATCGGAAGAGCGTCGT**/iSp18/CACTCA/iSp18/  
**CCGCTGGaaGTGaCTGaC-3**

>**LiK\_PEDDD-7 (50nt)**

/5Phos/DDD**AGCT**NNNNNNNN**AGATCGGAAGAGCGTCGT**/iSp18/CACTCA/iSp18/  
**CCGCTGGaaGTGaCTGaC-3**

>**LiK\_PEDDD-8 (50nt)**

/5Phos/DDD**TCGA**NNNNNNNN**AGATCGGAAGAGCGTCGT**/iSp18/CACTCA/iSp18/  
**CCGCTGGaaGTGaCTGaC-3**
